# Supplementary material for: Ligand recognition and G protein coupling of the human itch receptor MRGPRX1
Source: PubMed Central journal article supplement (PMC10435460; doi:10.1038/s41467-023-40705-z), 2023-08-17
Supplement: 41467_2023_40705_MOESM1_ESM.pdf [file 41467_2023_40705_MOESM1_ESM.pdf]

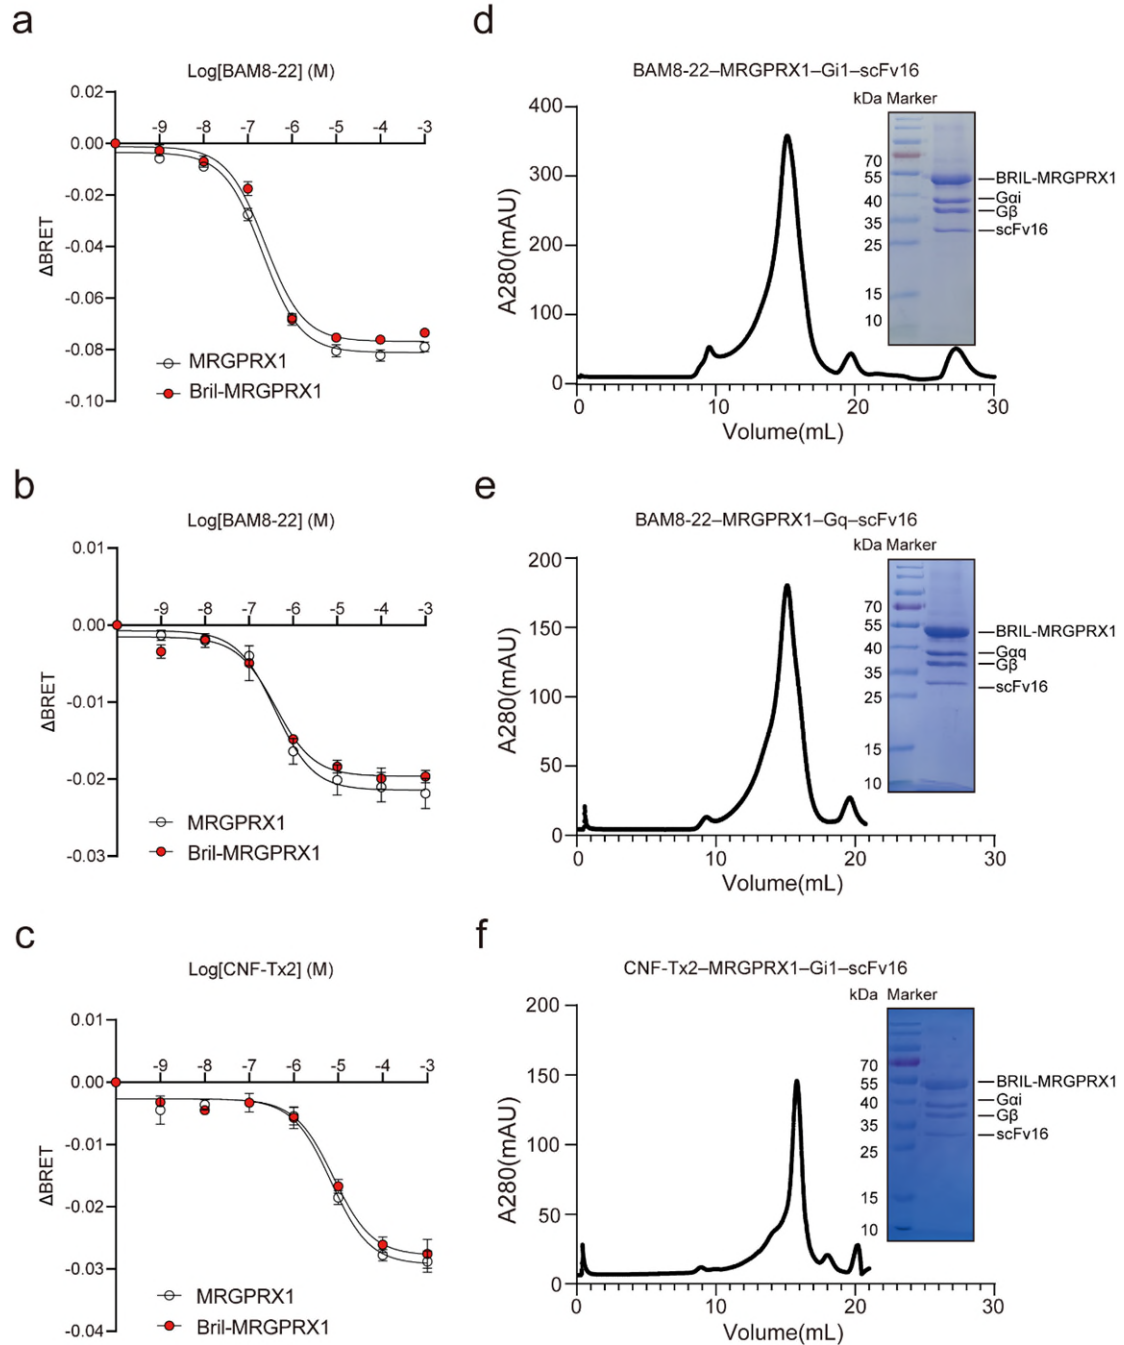

**Supplementary Fig. 1 Purification of MRGPRX1-Gi1-scFv complex.**

**(a-b)** Dose response curves of the BAM8-22 induced  $G_{\alpha i}$ - $G_{\gamma}$  dissociation (a) and  $G_{\alpha q}$ - $G_{\gamma}$  dissociation (b) in MRGPRX1-WT or Brill-MRGPRX1 overexpressing cells. Data from three independent experiments are presented as the mean  $\pm$  SEM (n=3). **(c)** Dose response curves of the CNF-Tx2 induced  $G_{\alpha i}$ - $G_{\gamma}$  dissociation in MRGPRX1-WT or Brill-MRGPRX1 overexpressing cells. Data from three independent experiments are presented as the mean  $\pm$  SEM (n=3). **(d)** Left panel: representative elution profile of BAM8-22-MRGPRX1-Gi1-scFv16 complex. BAM8-22-MRGPRX1-Gi1-scFv16 complex on Superose 6 Increase 10/300 column

and SDS-PAGE of the size-exclusion chromatography peak. Right panel, coomassie-stained PAGE of the isolated perk fraction from the Superose 6. **(e)** Left panel: representative elution profile of BAM8-22-MRGPRX1-Gq-scFv16 complex. BAM8-22-MRGPRX1-Gq-scFv16 complex on Superose 6 Increase 10/300 column and SDS-PAGE of the size-exclusion chromatography peak. Right panel, coomassie blue-stained PAGE of the isolated perk fraction from the Superose 6. **(f)** Left panel: representative elution profile of CNF-Tx2-MRGPRX1-Gi1-scFv16 complex. CNF-Tx2-MRGPRX1-Gi1-scFv16 complex on Superose 6 Increase 10/300 column and SDS-PAGE of the size-exclusion chromatography peak. Right panel, coomassie-blue stained PAGE of the isolated perk fraction from the Superose 6.

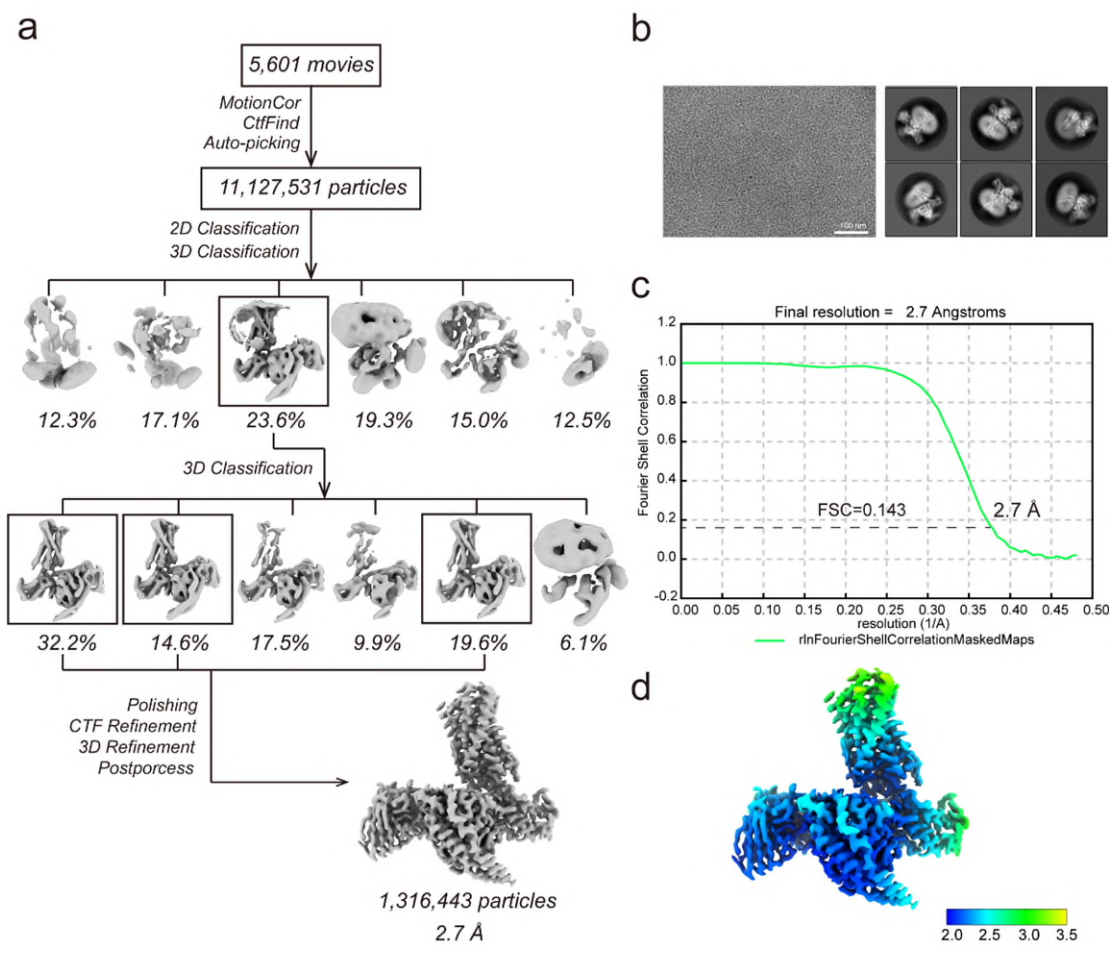

**Supplementary Fig. 2 Cryo-EM images and single particle reconstruction of the BAM8-22-MRGPRX1-Gq complex.**

(a) Flow chart for cryo-EM data processing of BAM8-22-MRGPRX1-Gq complex. (b) Representative Cryo-EM micrograph of BAM8-22-MRGPRX1-Gq complex (left) and 2D class averages (right). (c) Fourier shell correlation curves for the final 3D density maps of BAM8-22-bound MRGPRX1-Gq complex. At the fourier shell correlation (FSC) 0.143 cut-off, the overall resolution was 2.7Å. (d) 3D density map colored according to local resolution (Å) of the BAM8-22-MRGPRX1-Gq trimer complex.

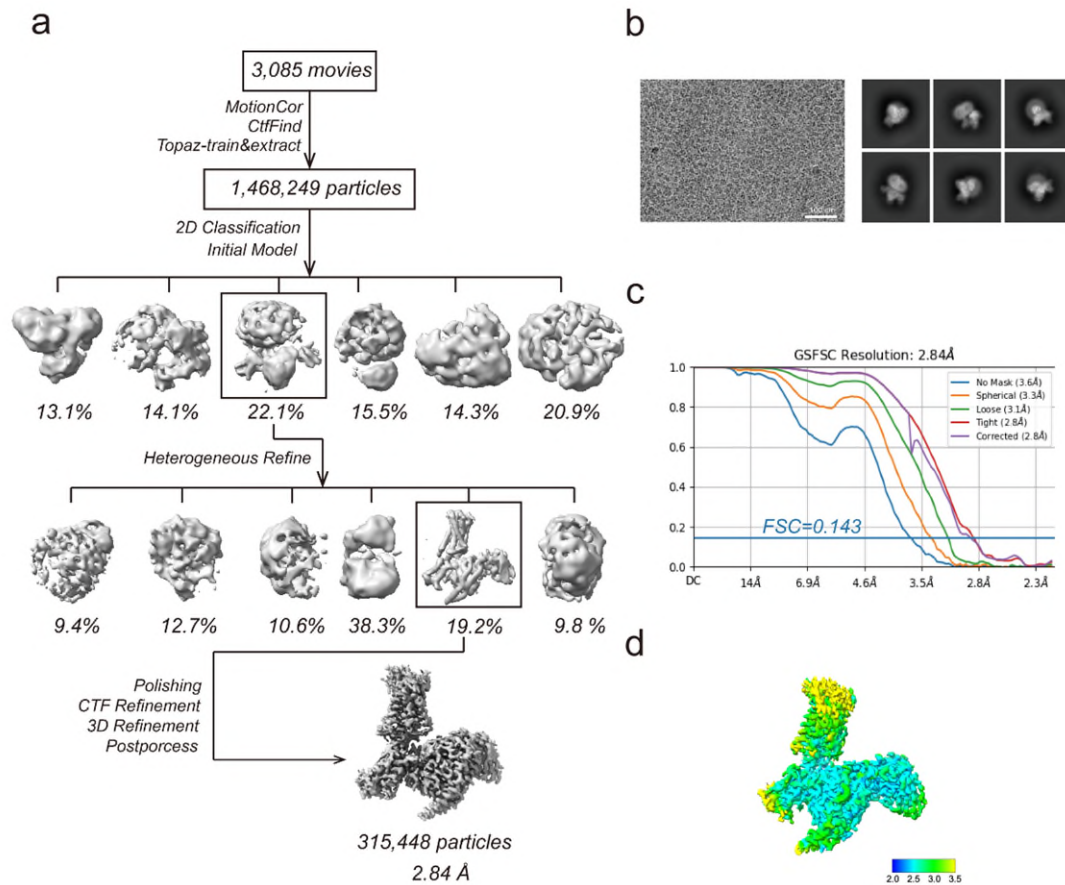

**Supplementary Fig. 3 Cryo-EM images and single particle reconstruction of the CNF-Tx2-MRGPRX1-Gi1 complex.**

**(a)** Flow chart for cryo-EM data processing of CNF-Tx2-MRGPRX1-Gi1 complex. **(b)** Representative Cryo-EM micrograph of CNF-Tx2-MRGPRX1-Gi1 complex (left) and 2D class averages (right). **(c)** Fourier shell correlation curves for the final 3D density maps of CNF-Tx2-MRGPRX1-Gi1 complex. At the fourier shell correlation (FSC) 0.143 cut-off, the overall resolution was 2.8 Å. **(d)** 3D density map colored according to local resolution (Å) of the CNF-Tx2-MRGPRX1-Gi1 trimer complex.

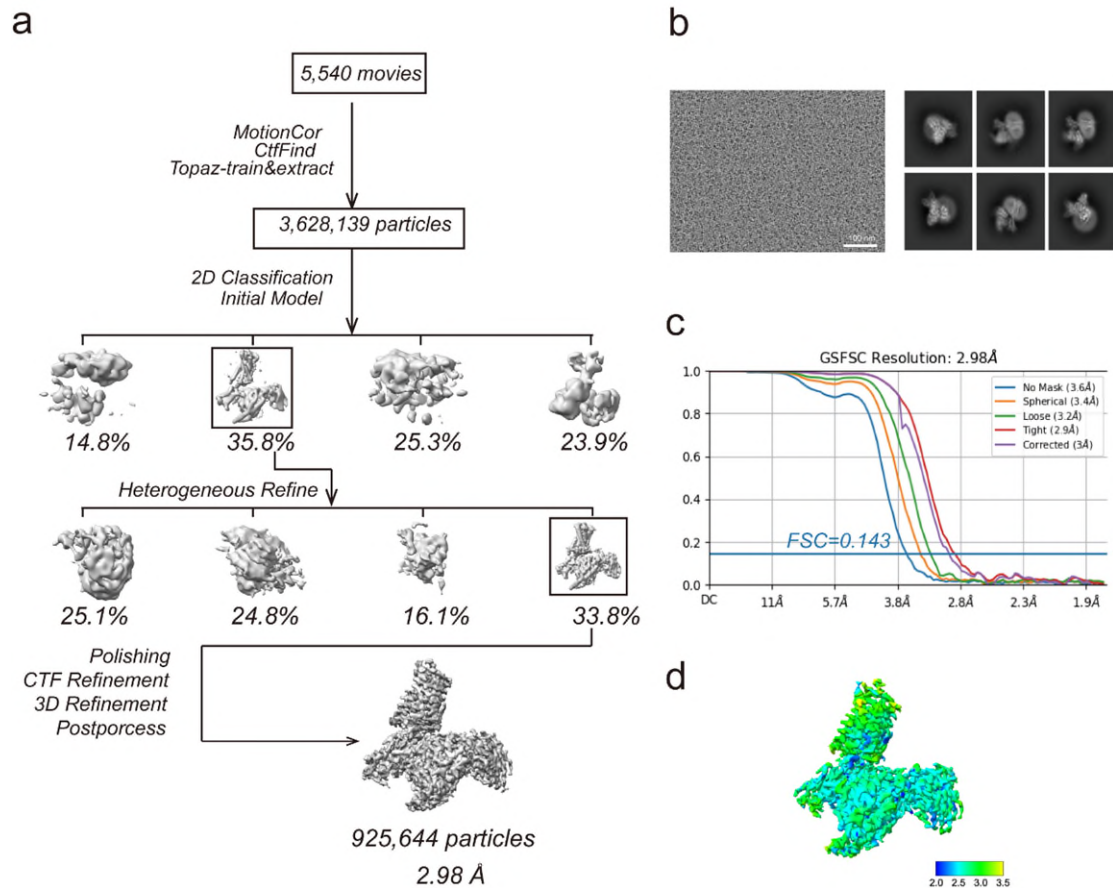

**Supplementary Fig. 4 Cryo-EM images and single particle reconstruction of the BAM8-22-MRGPRX1-Gi1 complex.**

**(a)** Flow chart for cryo-EM data processing of BAM8-22-MRGPRX1-Gi1 complex. **(b)** Representative Cryo-EM micrograph of BAM8-22-MRGPRX1-Gi1 (left) and 2D class averages (right). **(c)** Fourier shell correlation curves for the final 3D density maps of BAM8-22-bound MRGPRX1-Gi1 complex. At the fourier shell correlation (FSC) 0.143 cut-off, the overall resolution was 3.0 Å. **(d)** 3D density map colored according to local resolution (Å) of the BAM8-22-MRGPRX1-Gi1 trimer complex.

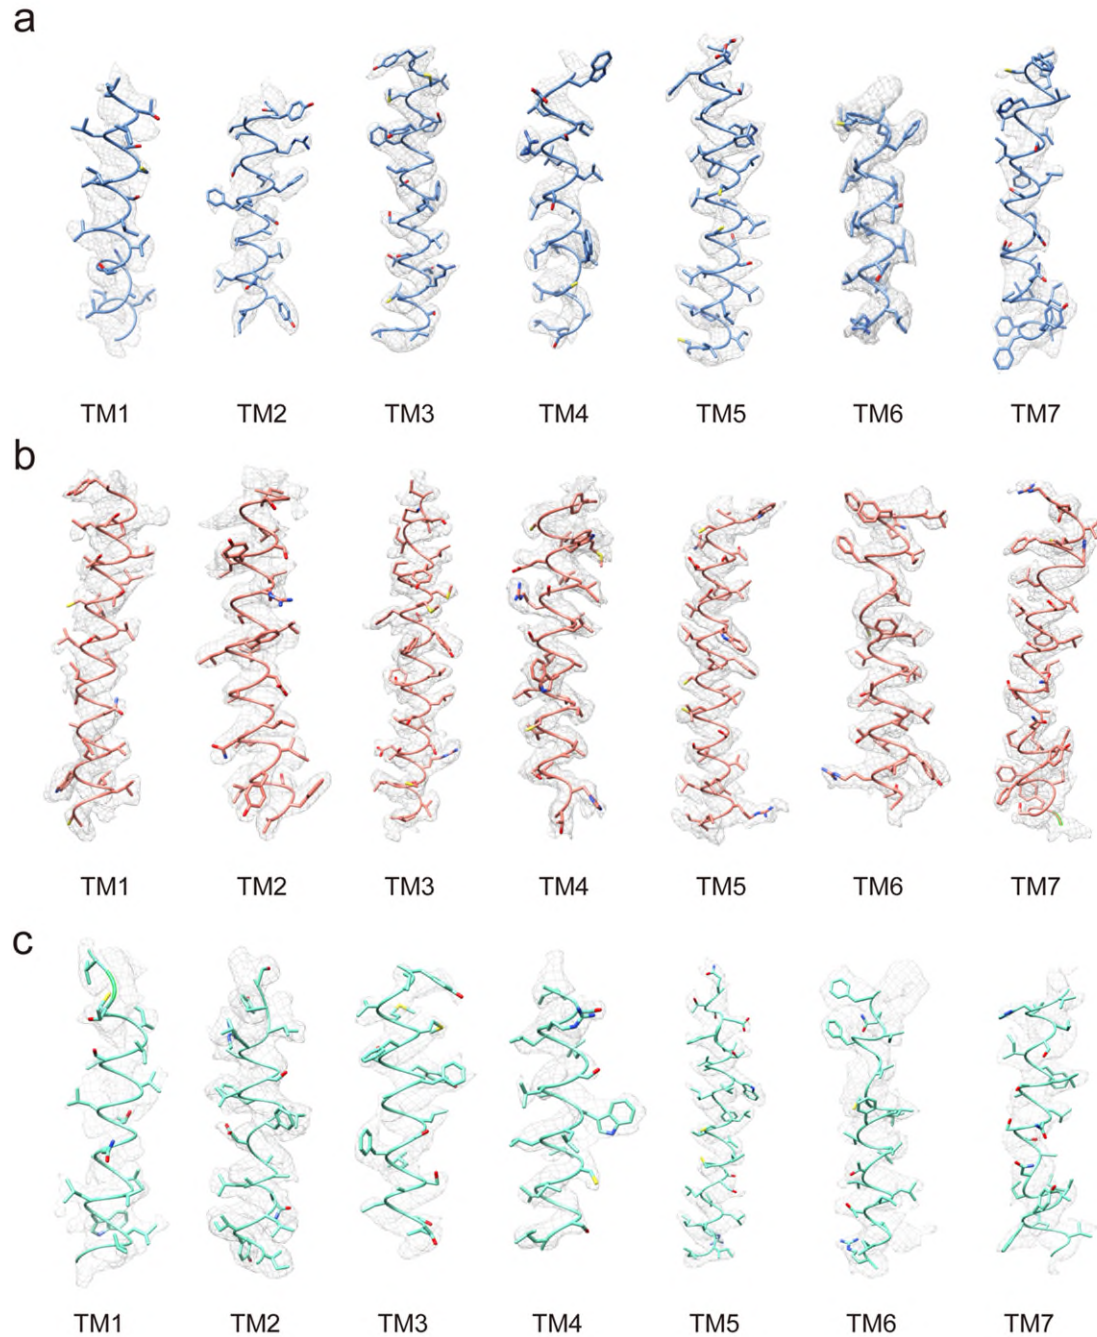

**Supplementary Fig. 5 Electron microscopy density map of BAM8-22-MRGPRX1-Gi1, BAM8-22-MRGPRX1-Gq and CNF-Tx2-MRGPRX1-Gi1 complex.**

Cryo-EM density of the transmembrane helices of MRGPRX1, including BAM8-22-MRGPRX1-Gi1 (a), BAM8-22-MRGPRX1-Gq (b) and CNF-Tx2-MRGPRX1-Gi1(c) cryo-EM structure respectively. All seven-TM bundles were unambiguously traceable in the cryo-EM density map, and the densities of large hydrophobic residues were utilized to assign the primary sequence of MRGPRX1.

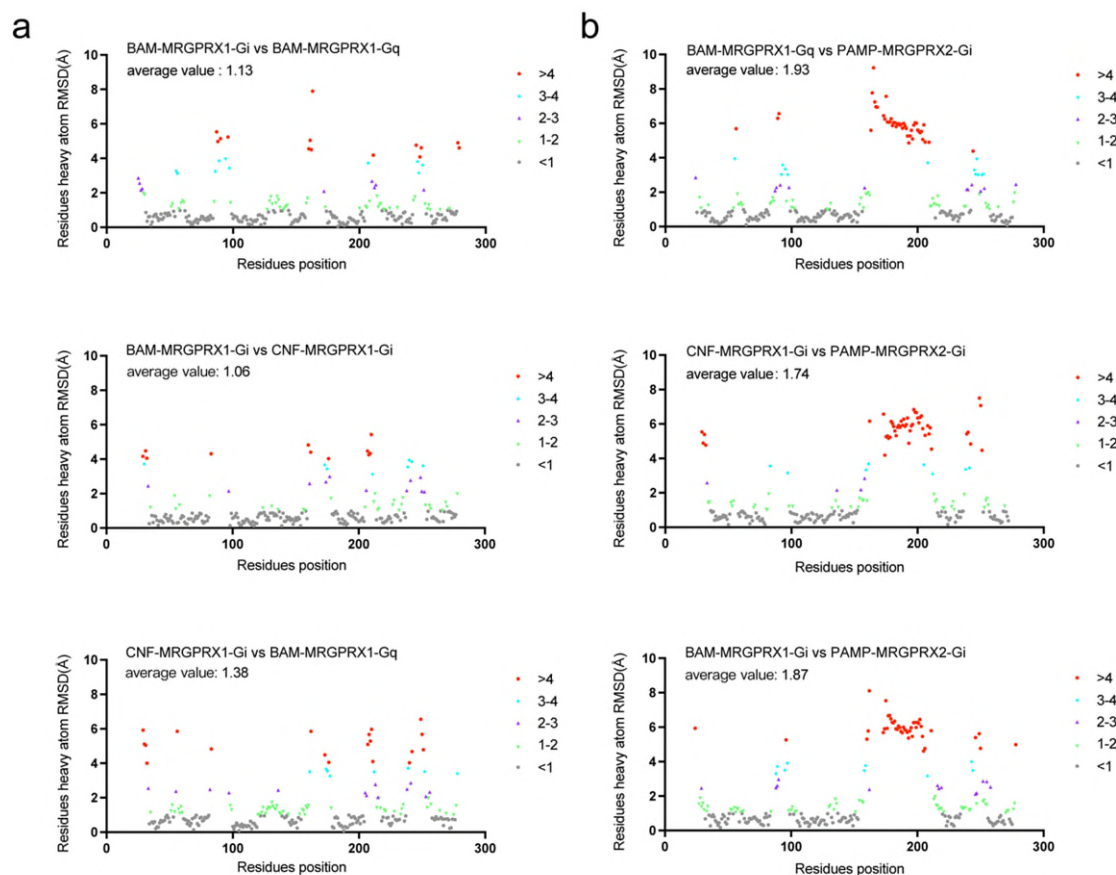

**Supplementary Fig. 6 The root-mean-square-deviation (RMSD) of MRGPRX1 bound with different ligands or compared with MRGPRX2 structure.**

**(a)** The root-mean-square-deviation (RMSD) of the overall structures of MRGPRX1 bound with different ligands assumed similar structures, including BAM8-22-MRGPRX1-Gi and BAM8-22-MRGPRX1-Gq (upper panel), BAM8-22-MRGPRX1-Gi and CNF-Tx2-MRGPRX1-Gi (middle panel), BAM8-22-MRGPRX1-Gq and CNF-Tx2-MRGPRX1-Gi (lower panel). **(b)** The root-mean-square-deviation (RMSD) of the overall structures of MRGPRX1, compared with our recently solved MRGPRX2 structure, including PAMP-12-MRGPRX2-Gi and BAM8-22-MRGPRX1-Gq (upper panel), PAMP-12-MRGPRX2-Gi and CNF-Tx2-MRGPRX1-Gi (middle panel), PAMP-12-MRGPRX2-Gi and BAM8-22-MRGPRX1-Gi (lower panel).

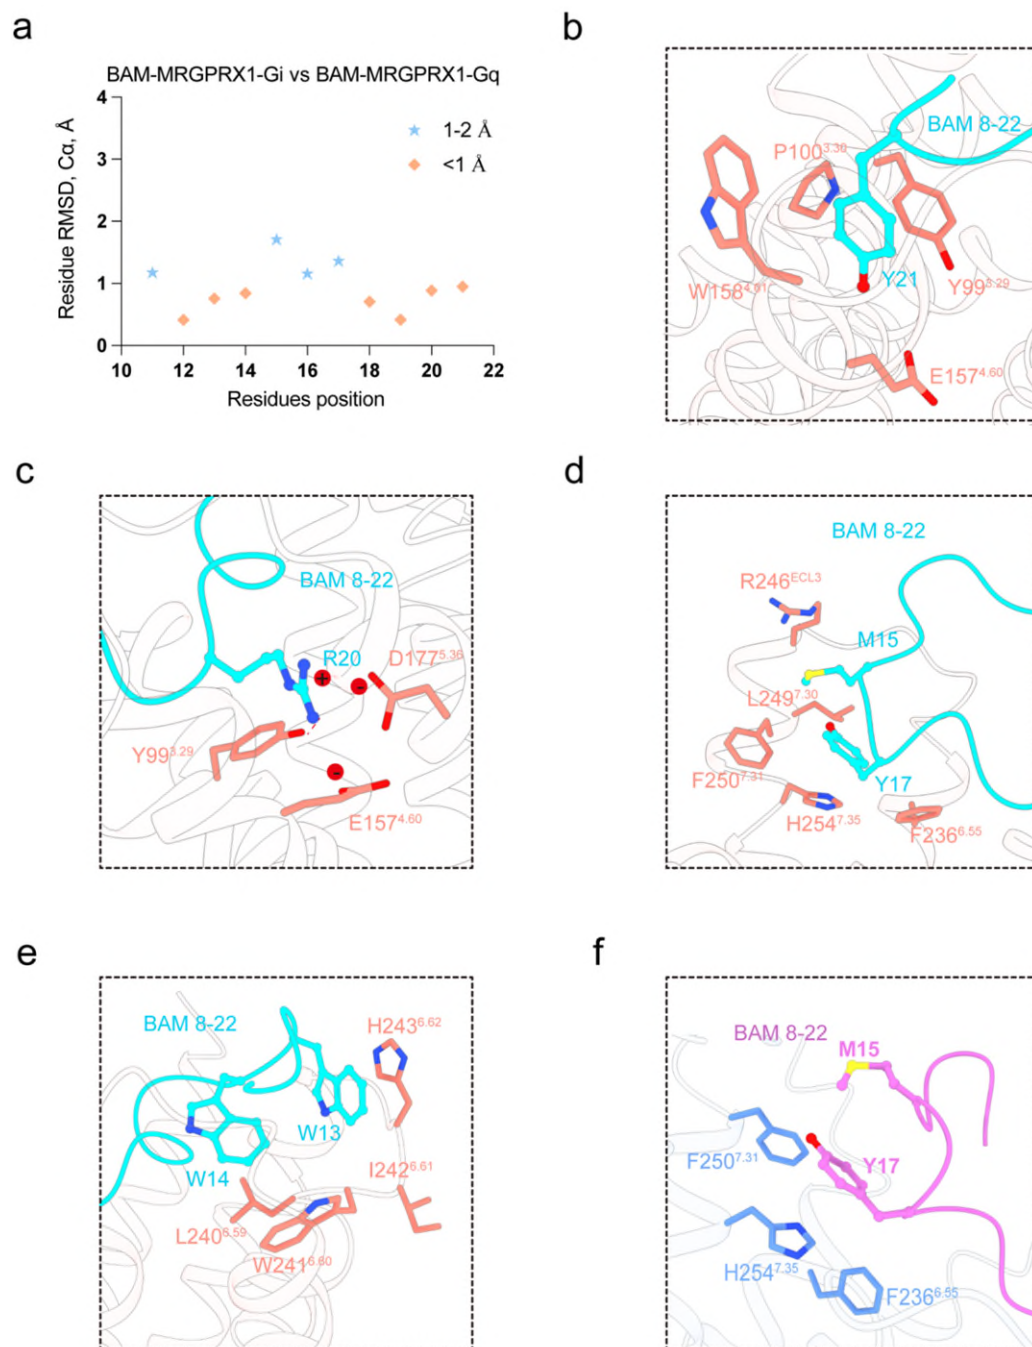

**Supplementary Fig. 7 Binding of BAM8-22 to MRGPRX1.**

(a) The root-mean-square-deviation (RMSD) of BAM8-22 between BAM8-22-MRGPRX1-Gi and BAM8-22-MRGPRX1-Gq complex structures. (b-e) Structural representations of the interactions surrounding the Y21(b), R20(c), M15 and Y17(d), W13 and W14(e) of MRGPRX1-Gq complex structures. Hydrogen bonds were shown in the red dash. (f) In the BAM8-22-MRGPRX1-Gi1 complex structure, the conformational changes of M15 and Y17 eliminated their interactions with R246<sup>ECL3</sup> and L249<sup>7.30</sup>.



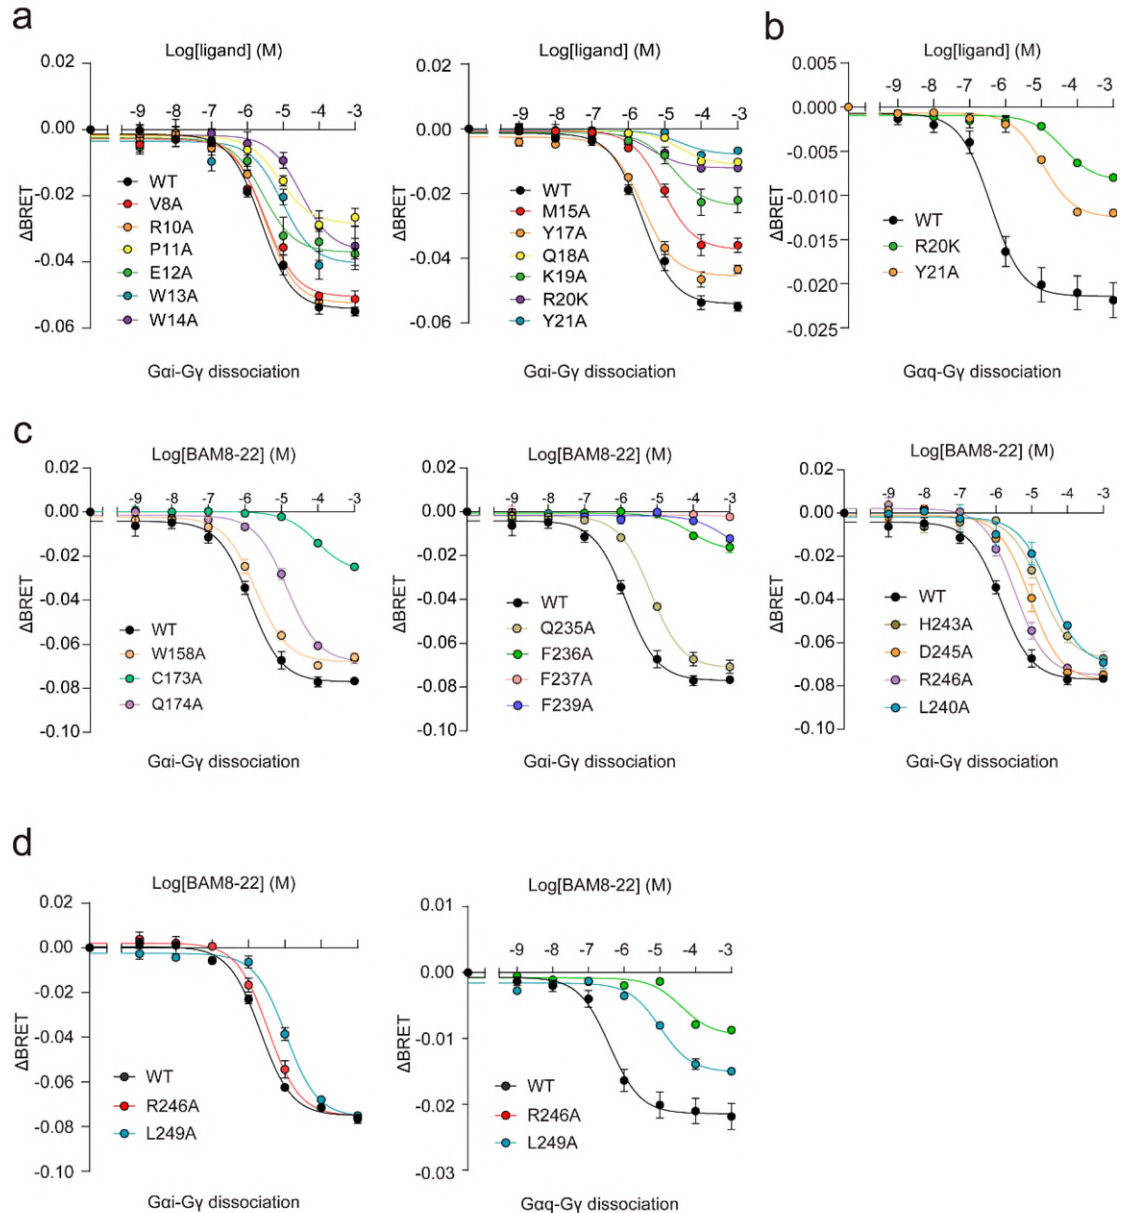

**Supplementary Fig. 8 Effects of different mutations in BAM8-22 or different mutations within the ligand-binding pocket of MRGPRX1 induced  $G_{\alpha i}$ - $G_{\gamma}$  and  $G_{\alpha q}$ - $G_{\gamma}$  dissociation.**

(a) Effects of different BAM8-22 mutations on BAM8-22 induced  $G_{\alpha i}$ - $G_{\gamma}$  dissociation in MRGPRX1 overexpressing HEK293 cells. The curve data from three independent measurements are measured as mean  $\pm$  SEM (n=3). (b) Effects of different BAM8-22 mutations on BAM8-22 induced  $G_{\alpha q}$ - $G_{\gamma}$  dissociation in MRGPRX1 overexpressing HEK293 cells. The curve data from three independent measurements are measured as mean  $\pm$  SEM (n=3). (c) Effects of different mutations within the ligand-binding pocket of MRGPRX1 on BAM8-22 induced  $G_{\alpha i}$ - $G_{\gamma}$  dissociation in MRGPRX1 overexpressing cells. The curve data from at least three independent measurements are measured as mean  $\pm$  SEM (n=3). (d) Effects of different mutations within the ligand-binding pocket of MRGPRX1 on BAM8-22 induced  $G_{\alpha i}$ - $G_{\gamma}$

dissociation and G $\alpha$ q-G $\gamma$  dissociation in MRGPRX1 overexpressing cells. The curve data from three independent measurements are measured as mean  $\pm$  SEM (n=3).

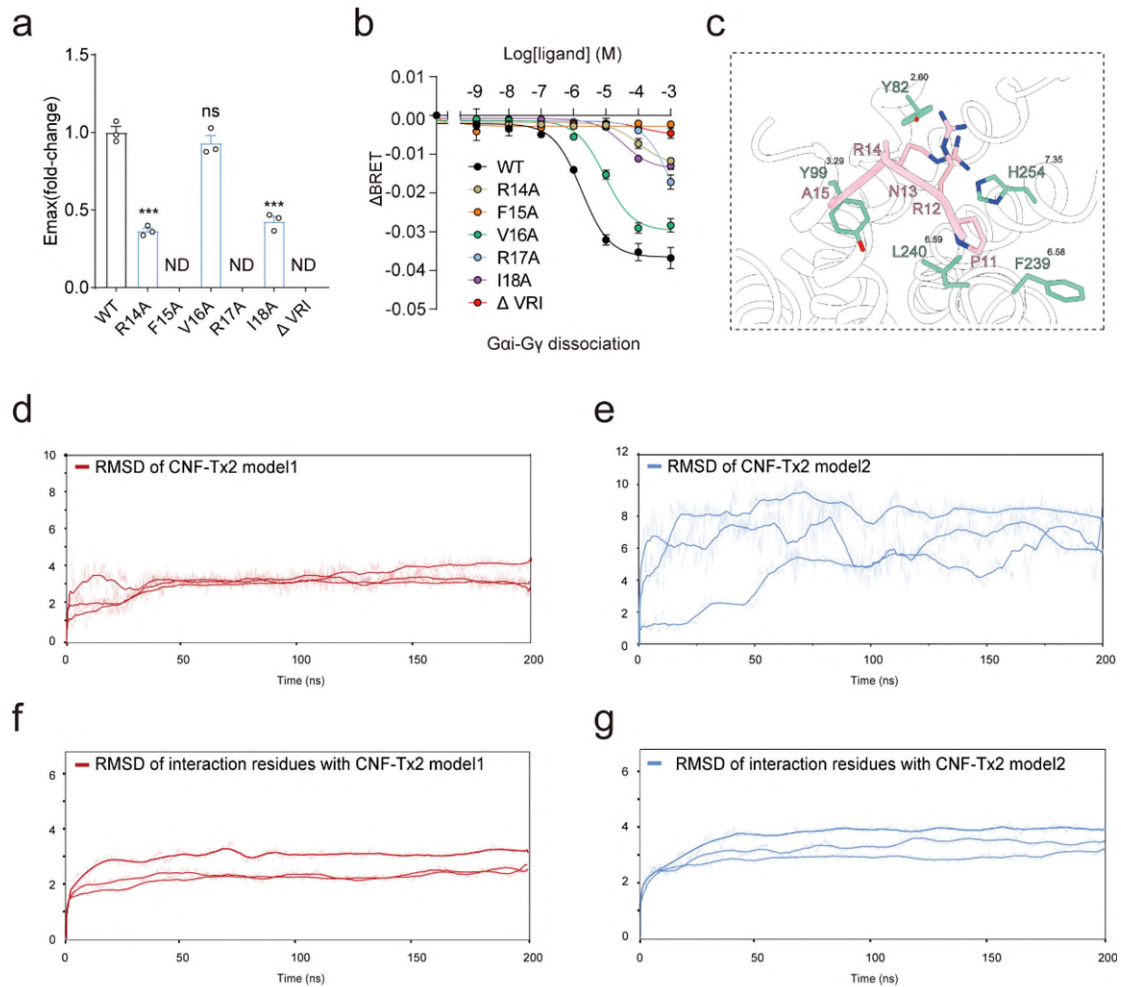

### Supplementary Fig. 9 Binding of CNF-Tx2 to MRGPRX1.

**(a)** Emax effects of different mutations on CNF-Tx2 of MRGPRX1 induced Gai-Gy dissociation. The maximal response (Emax) is presented as the mean  $\pm$  SEM of three independent experiments. Statistical differences between MRGPRX1 WT and mutations were determined by two-sided one-way ANOVA with Tukey test. \*,  $P < 0.05$ ; \*\*,  $P < 0.01$ ; \*\*\*,  $P < 0.001$ ; ns, no significant difference; ND, not detected. ( $P = P < 0.001$ , ND, 0.6262, 0.109,  $P < 0.001$  from left to right). **(b)** Effects of different CNF-Tx2 mutations on CNF-Tx2 induced Gai-Gy dissociation in MRGPRX1 overexpressing HEK293 cells. The curve data from three independent measurements are measured as mean  $\pm$  SEM ( $n = 3$ ). **(c)** Three-dimensional (3D) representation of the detailed interactions between CNF-Tx2 and MRGPRX1 in CNF-Tx2-MRGPRX1-Gi1-model2 complex. **(d-e)** The average RMSD value of CNF-Tx2 model1 (red) and CNF-Tx2 model2 (blue) during triplicate 200 ns MD simulations. **(f-g)** RMSD of key residues in MRGPRX1 which directly interact with CNF-Tx2 model1 (red) and CNF-Tx2 model2 (blue) during triplicate 200 ns MD simulations.

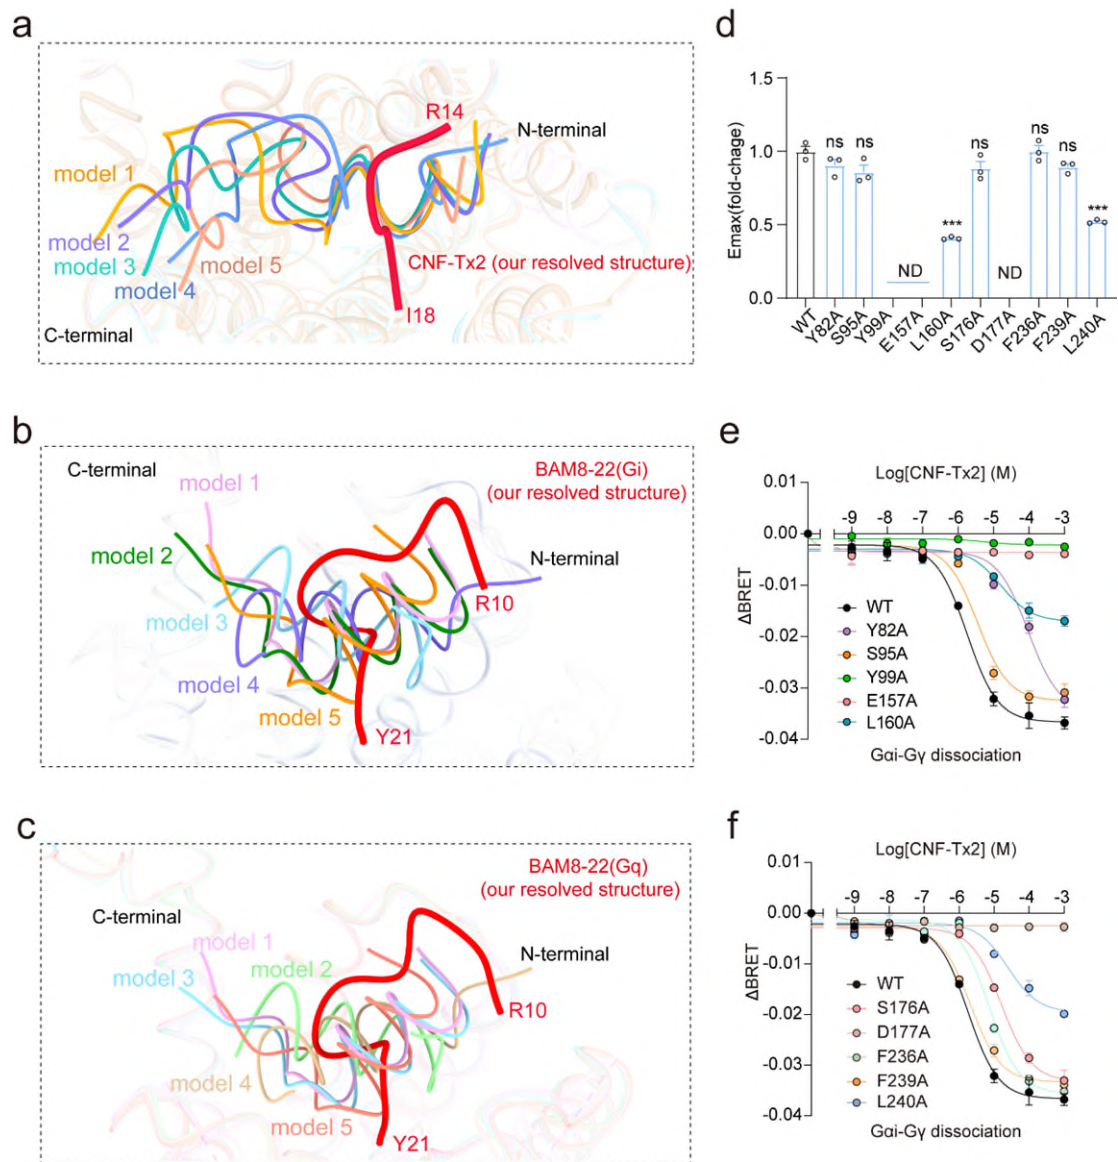

### Supplementary Fig. 10 Binding of CNF-Tx2 and BAM8-22 to MRGPRX1.

(a) Comparison of CNF-Tx2 binding modes simulated by Colabfold and in CNF-Tx2-MRGPRX1-Gi1 complex structure that our resolved. The CNF-Tx2 model 1-5 predicted by Colabfold are shown in tangold, skybluemedium slate blue, plummedium turquoise, cornflower bluelightgreen and dark salmonwheat, CNF-Tx2 in our resolved CNF-Tx2-MRGPRX1-Gi1 complex is shown in red. (b) Comparison of BAM8-22 binding modes simulated by Colabfold and in BAM8-22-MRGPRX1-Gi1 complex structure that our resolved. The BAM8-22 model 1-5 predicted by Colabfold are shown in plum, dark green, light sky blue, medium purple and dark orange, BAM8-22 in our resolved BAM8-22-MRGPRX1-Gi1 complex is shown in red. (c) Comparison of BAM8-22 binding modes simulated by Colabfold and in BAM8-22-MRGPRX1-Gq complex structure that our resolved. The BAM8-22 model 1-5 predicted by Colabfold are shown in plum, light cyan, light sky blue, tan and light coral, BAM8-22 in our

resolved BAM8-22-MRGPRX1-Gq complex is shown in red. **(d)** Emax effects of different mutations within the ligand-binding pocket of MRGPRX1 on CNF-Tx2 induced G $\alpha$ i-G $\gamma$  dissociation. Statistical differences between MRGPRX1 WT and mutations were presented as the mean  $\pm$  SEM of three independent experiments and determined by two-sided one-way ANOVA with Tukey test. \*, P<0.05; \*\*, P<0.01; \*\*\*, P<0.001; ns, no significant difference; ND, not detected. (P=ns, ns, ND, ND, <0.001, ns, ND, ns, ns, <0.001 from left to right). **(e-f)** Effects of different mutations within the ligand-binding pocket of MRGPRX1 on CNF-Tx2 induced G $\alpha$ i-G $\gamma$  dissociation in MRGPRX1 overexpressing cells. The curve data from three independent measurements are measured as mean  $\pm$  SEM (n=3).

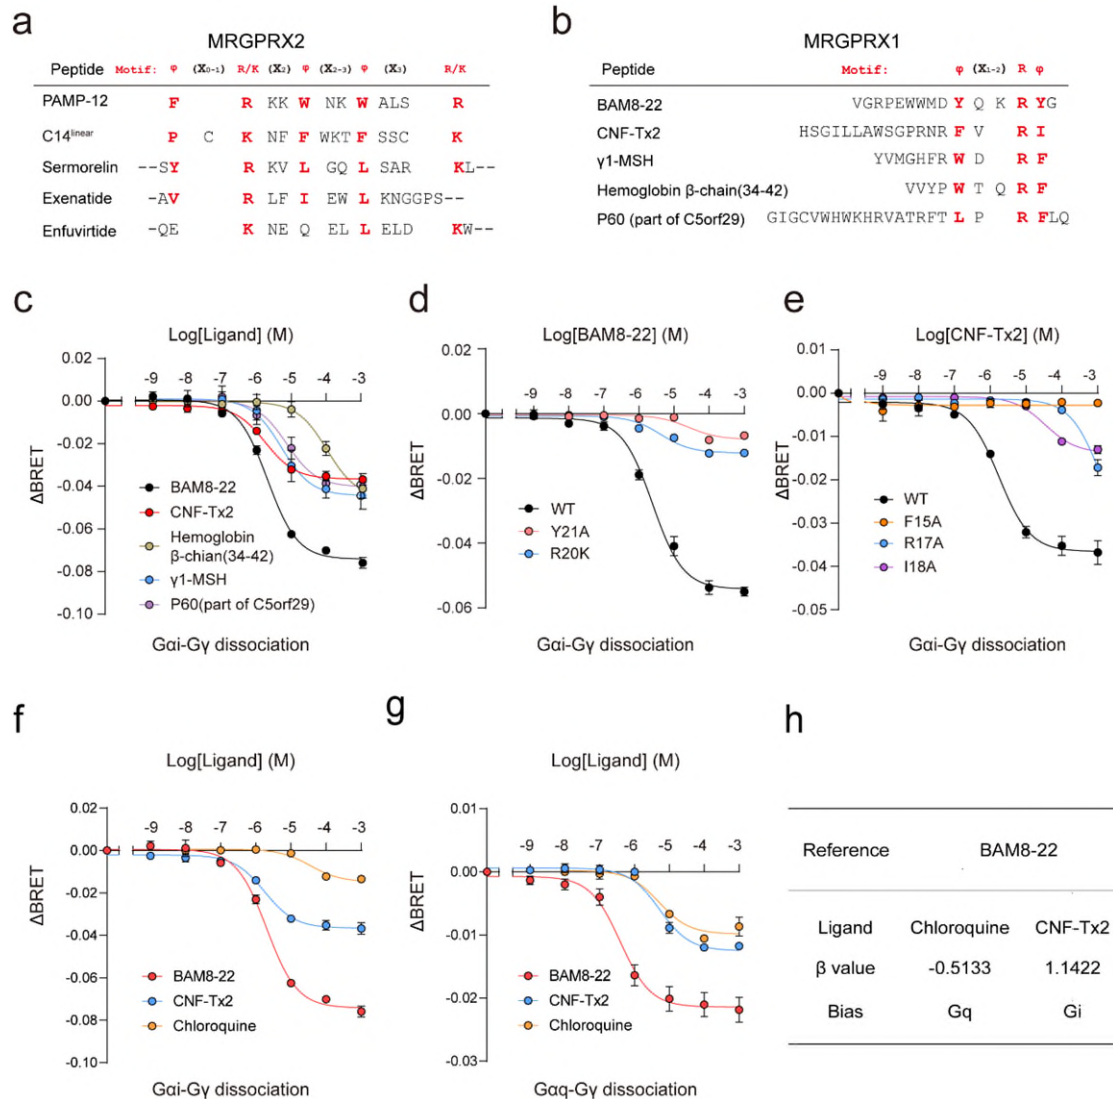

**Supplementary Fig. 11 Sequence alignment of peptide common motif recognized by MRGPRX1 and MRGPRX2.**

(a) Peptide ligand sequences of MRGPRX2. Sequence comparisons of several peptide-based allergens with similarities to the  $\varphi^{p9}(X_{0-1})$  R/K $\varphi^{10}(X_2)$   $\varphi^{p13}(X_{2-3})$   $\varphi^{p16}(X_3)$  R/K $\varphi^{20}$  motif. (b) Peptide ligand sequences of MRGPRX1. Sequence comparisons of several peptide-based allergens with similarities to the  $\varphi^{B17}(X_{1-2})$  R $\varphi^{20}$   $\varphi^{B21}$  motif. (c) Effects of BAM8-22, CNF-Tx2,  $\gamma$ 1-MSH, hemoglobin  $\beta$ -chain, P60 (part of C5orf29) induced MRGPRX1 activation evaluated via Gai-G $\gamma$  dissociation assay. Data from three independent experiments are presented as the mean  $\pm$  SEM (n=3). All data were analyzed by two-sided one-way ANOVA with Turkey test. (d) Effects of different BAM8-22 mutations on BAM8-22 induced Gai-G $\gamma$  dissociation. Data from three independent experiments are presented as the mean  $\pm$  SEM (n=3). All data were analyzed by two-sided one-way ANOVA with Turkey test. (e) Effects of different CNF-Tx2 mutations on CNF-Tx2 induced Gai-G $\gamma$  dissociation. Data from three independent experiments

are presented as the mean  $\pm$  SEM (n=3). All data were analyzed by two-sided one-way ANOVA with Turkey test. **(f)** Concentration-dependent response curves of MRGPRX1 in response to ligands by G $\alpha$ i-G $\gamma$  dissociation assay. Values are mean  $\pm$  SEM from three independent experiments (n=3) performed in triplicates. **(g)** Concentration-dependent response curves of MRGPRX1 in response to ligands by G $\alpha$ q-G $\gamma$  dissociation assay. Values are mean  $\pm$  SEM from three independent experiments (n=3) performed in triplicates. **(h)** Comparison of the biased properties of CNF-Tx2 and Chloroquine. Both CNF-Tx2 and Chloroquine were assessed for Gi signaling (f) and Gq signaling (g). The bias factor ( $\beta$  value) of CNF-Tx2 and Chloroquine was calculated using BAM8-22 as the reference.

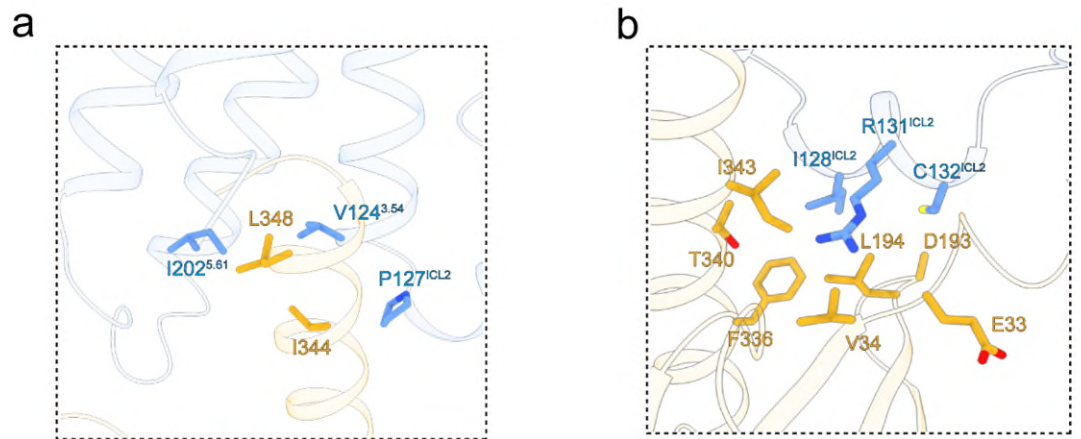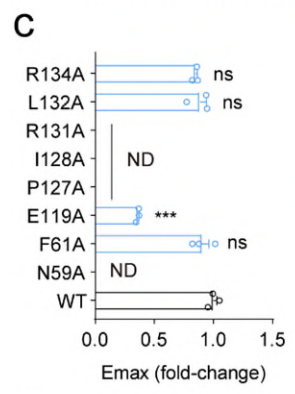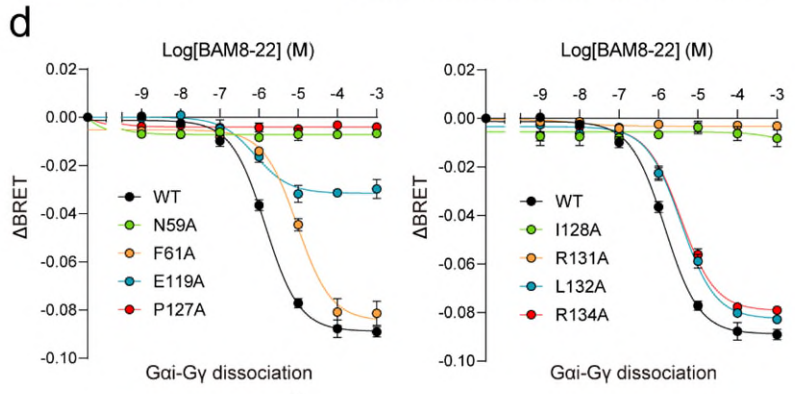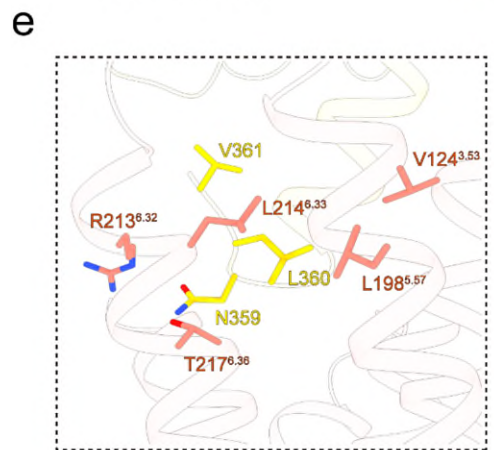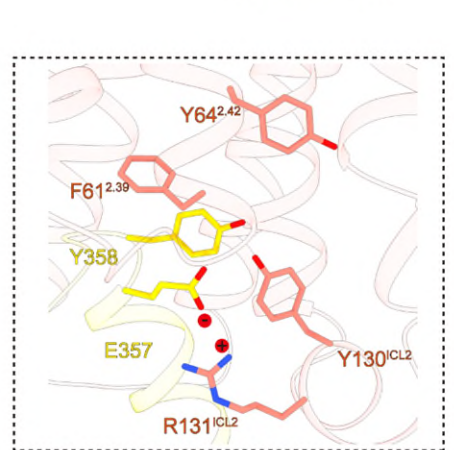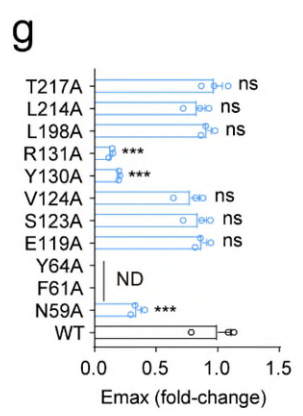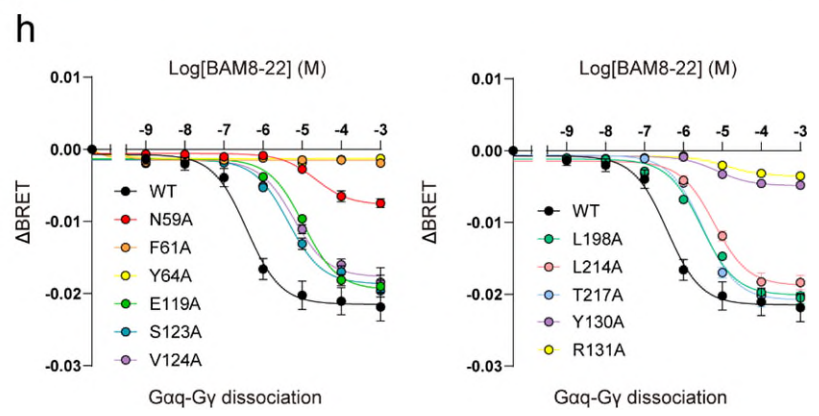



### Supplementary Fig. 12 Coupling of MRGPRX1 with Gi and Gq.

**(a)** Detailed interactions between the TM bundles of MRGPRX1 and the  $\alpha 5$ -helix end of G $\alpha$ i. **(b)** Detailed interactions between the ICL2 of MRGPRX1 and the G $\alpha$ i. **(c)** Emax effects of different mutations of G protein interface mutations of MRGPRX1 on G $\alpha$ i. Statistical differences between MRGPRX1 WT and mutations were presented as the mean  $\pm$  SEM of three independent experiments and determined by two-sided one-way ANOVA with Tukey test. \*, P<0.05; \*\*, P<0.01; \*\*\*, P<0.001; ns, no significant difference; ND, not detected. (P=<0.001, <0.001, ND, ND, ND, <0.001, <0.001, ND from top to bottom). **(d)** The effects of G protein interface mutations of MRGPRX1 on G $\alpha$ i. The curve data from three independent measurements are measured as mean  $\pm$  SEM (n=3). **(e)** Detailed interactions between the bulky end of  $\alpha 5$  helix of G $\alpha$ q and the V124<sup>3.54</sup>, L198<sup>5.57</sup>, R213<sup>6.32</sup>, L214<sup>6.33</sup> and T217<sup>6.36</sup> of MRGPRX1. **(f)** Detailed interactions between the E357<sup>G.H5.22</sup>, Y358<sup>G.H5.23</sup> of G $\alpha$ q and Y64<sup>2.42</sup>, F61<sup>2.39</sup> and Y130<sup>ICL2</sup>, R131<sup>ICL2</sup> of MRGPRX1. **(g)** Emax effects of different mutations of G protein interface mutations of MRGPRX1 on G $\alpha$ q. Statistical differences between MRGPRX1 WT and mutations were presented as the mean  $\pm$  SEM of three independent experiments and determined by two-sided one-way ANOVA with Tukey test. \*, P<0.05; \*\*, P<0.01; \*\*\*, P<0.001; ns, no significant difference; ND, not detected. (P=0.0007, <0.001, 0.0222, <0.001, <0.001, <0.001, 0.0005, <0.001, ND, ND, <0.001 from top to bottom). **(h)** The effects of G protein interface mutations of MRGPRX1 on G $\alpha$ q. The curve data from three independent measurements are measured as mean  $\pm$  SEM (n=3).

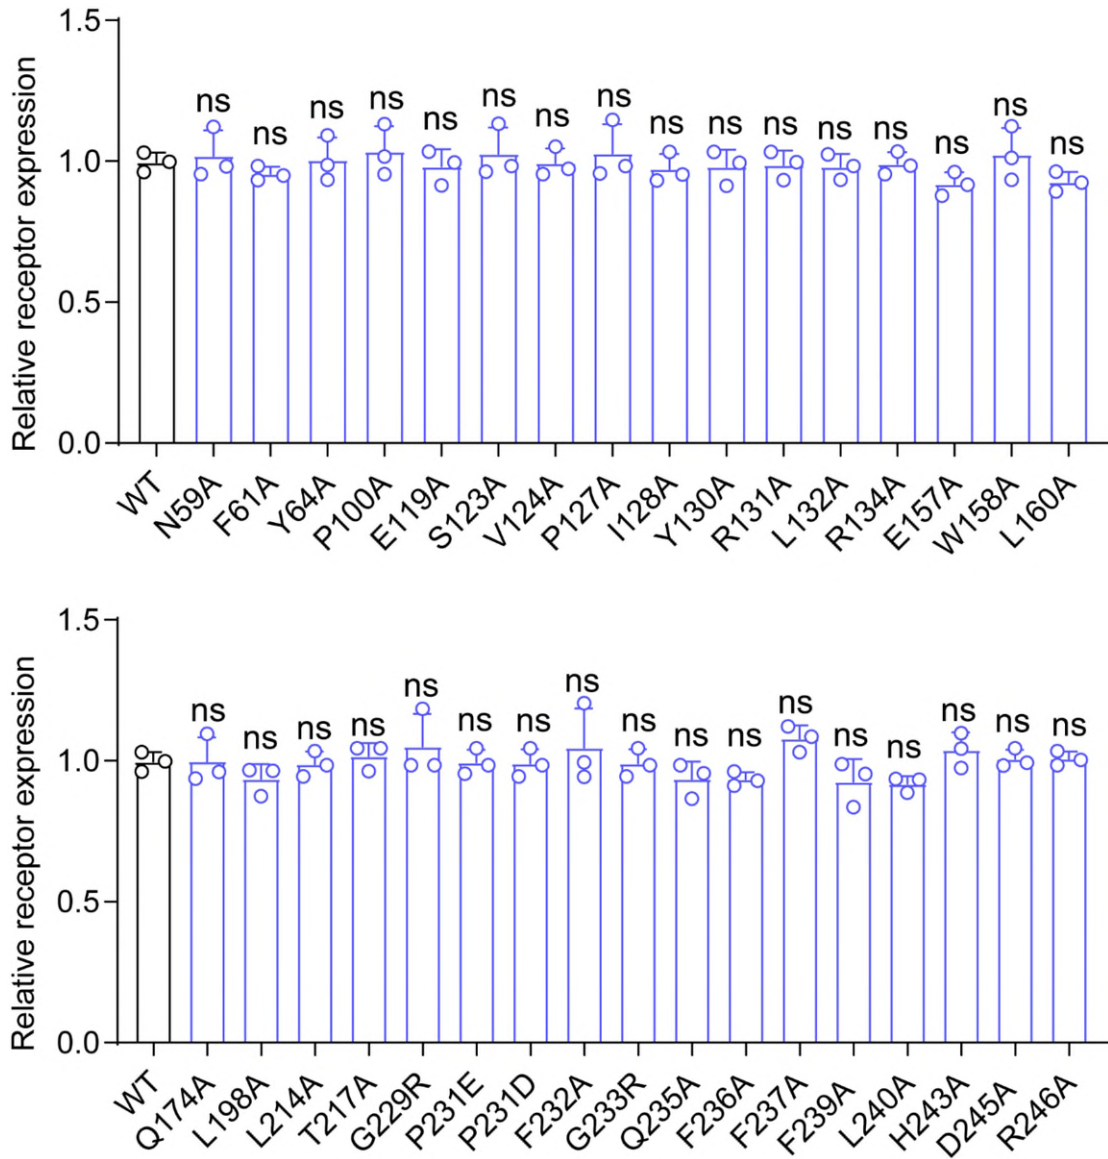

**Supplementary Fig. 13 Expression level of relative MRGPRX1 wild type or mutants determined by ELISA.**

Values are mean  $\pm$  SEM from three independent experiments (n=3) performed in triplicates. ns, no significance. All data were analyzed by two-sided one-way ANOVA with Turkey test.

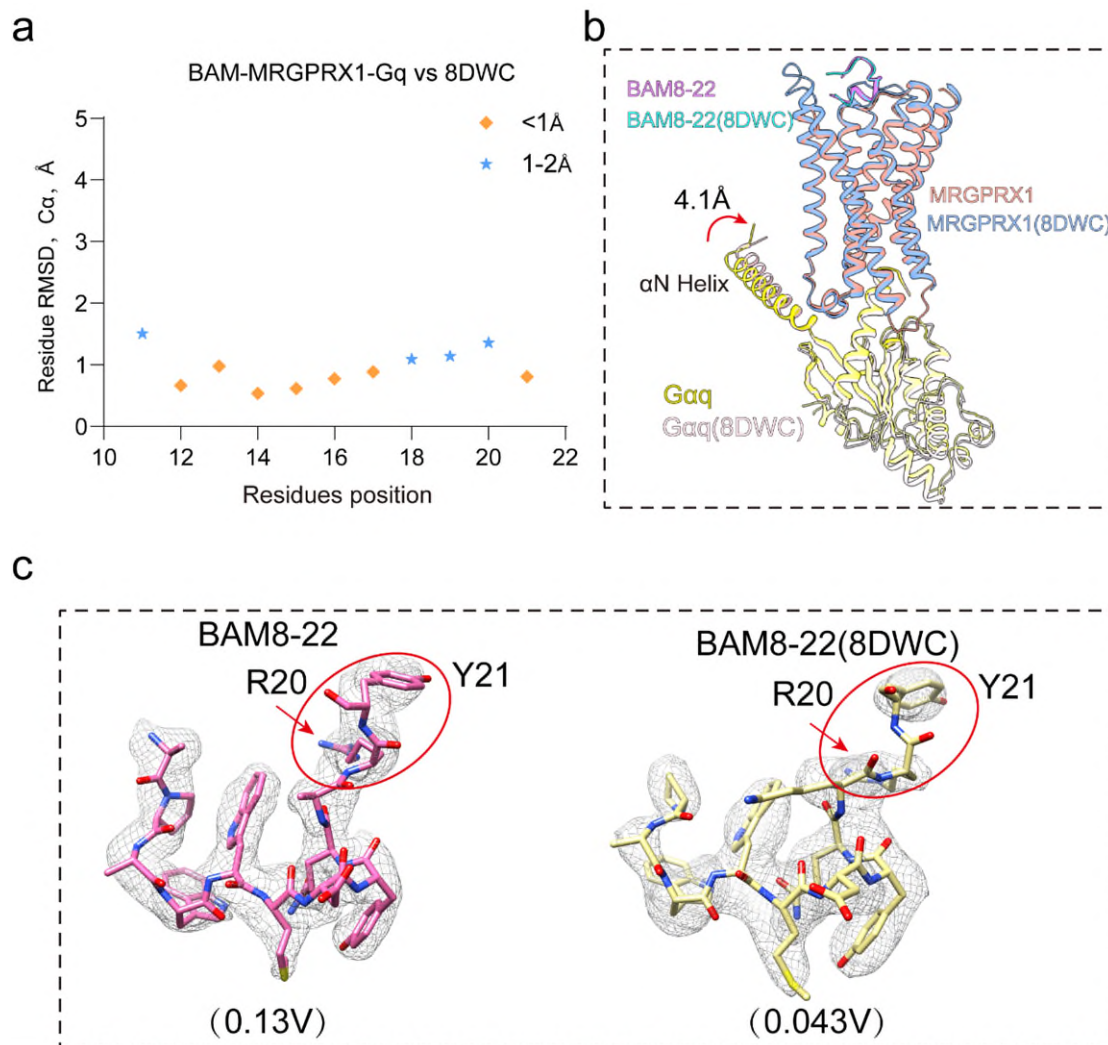

**Supplementary Fig. 14 Comparison of the structure of BAM8-22-MRGPRX1-Gq complex (we solved vs. PDB ID: 8DWC).**

(a) The root-mean-square-deviation (RMSD) of BAM8-22 between BAM8-22-MRGPRX1-Gq and 8DWC complex structures. (b) Comparison of the difference in MRGPRX1 TMs and G protein between the newly solved BAM8-22-MRGPRX1-Gq structure (green) and the structure solved by Yongfeng Liu et al. (PDB: 8DWC) through a cytoplasmic view. (c) Comparison of ligand densities in the BAM8-22-MRGPRX1-Gq and 8DWC structures.

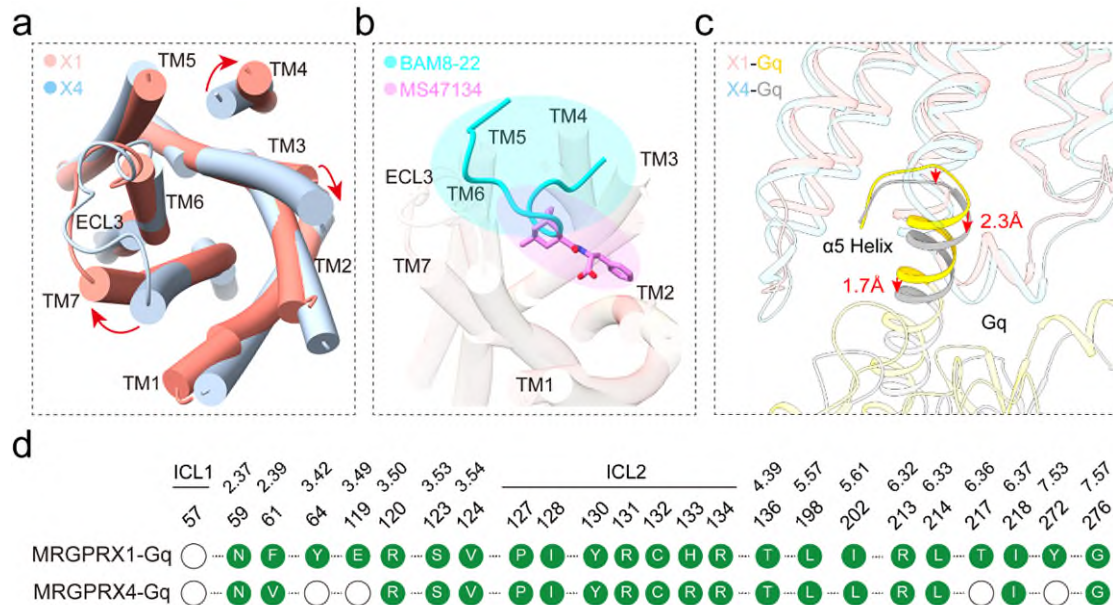

**Supplementary Fig. 15 Structural comparison of MRGPRX1 with MRGPRX4.**

**(a)** A cytoplasmic view of the BAM8-22-MRGPRX1 7TM bundle compared with MS47134-MRGPRX4 (PDB ID: 7S8P). MRGPRX1 is shown in salmon, MRGPRX4 in light sky blue. **(b)** Three-dimensional (3D) representation of BAM8-22 in the MRGPRX1 and MS47134-MRGPRX4 (PDB ID: 7S8P). BAM8-22 is shown in cyan, MS47134 in hot pink. **(c)** The structural representation and comparison of the interfaces between the MRGPRX1-Gq and MRGPRX4-Gq complexes. Ribbon representation: Gq bound to MRGPRX1 is shown in yellow, Gq bound to MRGPRX4 is shown in gray. **(d)** Comparison of the Gq coupling interfaces in cryo-EM structures of BAM8-22-MRGPRX1-Gq and MS47134-MRGPRX4 (PDB ID: 7S8P) complexes. Residues of MRGPRX1 in contact with Gq were illustrated as green dots.

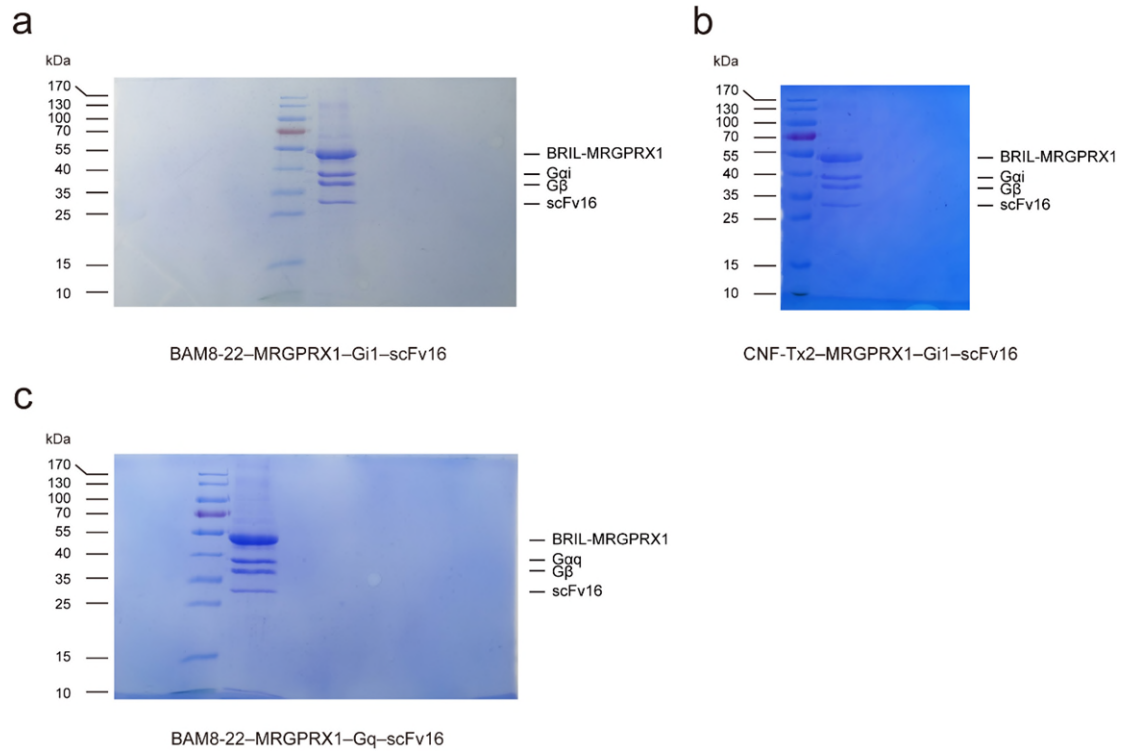

**Supplementary Fig. 16 (a-c) SDS-PAGE of the size-exclusion chromatography peak of MRGPRX1-Gi1-scFv16 and MRGPRX1-Gq-scFv16 complex. (Raw data of Supplementary Fig. 1)**

**Supplementary Table 1: Cryo-EM Data Collection, Model Refinement, and Validation Statistics.**

|                                                  | BAM8-22-<br>MRGPRX1-Gq<br>(EMDB-36232)<br>(PDB 8JGF) | CNF-Tx2-<br>MRGPRX1-Gi<br>(EMDB-36229)<br>(PDB 8JGB) | BAM8-22-<br>MRGPRX1-Gi<br>(EMDB-36233)<br>(PDB 8JGG) |
|--------------------------------------------------|------------------------------------------------------|------------------------------------------------------|------------------------------------------------------|
| <b>Data collection and processing</b>            |                                                      |                                                      |                                                      |
| Magnification                                    | 81,000                                               | 130,000                                              | 130,000                                              |
| Voltage (kV)                                     | 300                                                  | 300                                                  | 300                                                  |
| Electron exposure (e-/Å <sup>2</sup> )           | 50                                                   | 50                                                   | 60                                                   |
| Defocus range (µm)                               | -1.2 to -2.2                                         | -0.8 to -1.2                                         | -0.8 to -1.2                                         |
| Pixel size (Å)                                   | 1.04                                                 | 1.08                                                 | 0.89                                                 |
| Symmetry imposed                                 | C1                                                   | C1                                                   | C1                                                   |
| Initial particle images (no.)                    | 11,127,531                                           | 146,824,9                                            | 3,628,139                                            |
| Final particle images (no.)                      | 1,316,443                                            | 315,448                                              | 925,644                                              |
| Map resolution (Å)                               | 2.7                                                  | 2.8                                                  | 3.0                                                  |
| FSC threshold                                    | 0.143                                                | 0.143                                                | 0.143                                                |
| Map resolution range (Å)                         | 2.0-3.5                                              | 2.0-3.5                                              | 2.0-3.5                                              |
| <b>Refinement</b>                                |                                                      |                                                      |                                                      |
| Initial model used (PDB code)                    | 7UVY                                                 | 7UVY                                                 | 7UVY                                                 |
| Model resolution (Å)                             | 3.1                                                  | 3.0                                                  | 3.2                                                  |
| FSC threshold                                    | 0.5                                                  | 0.5                                                  | 0.5                                                  |
| Model resolution range (Å)                       | 2.0-3.5                                              | 2.0-3.5                                              | 2.0-3.5                                              |
| Map sharpening <i>B</i> factor (Å <sup>2</sup> ) | -129.7                                               | -101.8                                               | -137.2                                               |
| Model composition                                |                                                      |                                                      |                                                      |
| Non-hydrogen atoms                               | 8338                                                 | 7807                                                 | 7889                                                 |
| Protein residues                                 | 1101                                                 | 1062                                                 | 1076                                                 |
| Ligands                                          | 1                                                    | 1                                                    | 1                                                    |
| <i>B</i> factors (Å <sup>2</sup> )               |                                                      |                                                      |                                                      |
| Protein                                          | 27.93                                                | 50.79                                                | 92.83                                                |
| R.m.s. deviations                                |                                                      |                                                      |                                                      |
| Bond lengths (Å)                                 | 0.008                                                | 0.010                                                | 0.007                                                |
| Bond angles (°)                                  | 1.105                                                | 1.384                                                | 1.145                                                |
| Validation                                       |                                                      |                                                      |                                                      |
| MolProbity score                                 | 1.78                                                 | 2.16                                                 | 1.92                                                 |
| Clashscore                                       | 8                                                    | 7                                                    | 9                                                    |
| Poor rotamers (%)                                | 0.1                                                  | 0                                                    | 0.7                                                  |
| Ramachandran plot                                |                                                      |                                                      |                                                      |
| Favored (%)                                      | 95.74                                                | 93.82                                                | 94.30                                                |
| Allowed (%)                                      | 4.26                                                 | 6.18                                                 | 5.70                                                 |
| Disallowed (%)                                   | 0                                                    | 0                                                    | 0                                                    |

**Supplementary Table 2: The summary of models and maps. Related to Figure 1 to Figure 5.**

| <b>Model</b>              | <b>Map</b>              | <b>Contour Level</b> | <b>Residue</b>                                                                                                                                                                                                 | <b>Description</b>                                                                                                                                                                                                                                                                                                                                            |
|---------------------------|-------------------------|----------------------|----------------------------------------------------------------------------------------------------------------------------------------------------------------------------------------------------------------|---------------------------------------------------------------------------------------------------------------------------------------------------------------------------------------------------------------------------------------------------------------------------------------------------------------------------------------------------------------|
| BAM8-22_MR GPRX1_Gi_model | BAM8-22_MR GPRX1_Gi_map | 3.60 rmsd            | Receptor: L28-G276<br>G $\alpha$ i: S6-I55, T182-F354<br>G $\beta$ : D5-N340<br>G $\gamma$ : S8-K64<br>scFv: V2-L235<br>ECL1, ECL2 and ICL3 are in general disordered in GPCR structures and are not modeled.  | (1) In the section of “Overall structures of MRGPRX1 complexes”, used for structural descriptions for BAM8-22_MR GPRX1_Gi complex (Fig. 1 and Supplementary Fig.5)<br>(2) In the section of “Binding of BAM8-22 to MRGPRX1” (Fig. 2 and Supplementary Fig.7)<br>(3) In the section of “Coupling of MRGPRX1 with Gi and Gq” (Fig. 5 and Supplementary Fig. 10) |
| BAM8-22_MR GPRX1_Gq_model | BAM8-22_MR GPRX1_Gq_map | 4.10 rmsd            | Receptor: Y24-R279<br>G $\alpha$ q: A7-R54, T182-V361<br>G $\beta$ : D10-N345<br>G $\gamma$ : A9-R61<br>scFv: V1-L247<br>ECL1, ECL2 and ICL3 are in general disordered in GPCR structures and are not modeled. | (1) In the section of “Overall structures of MRGPRX1 complexes”, used for structural descriptions for BAM8-22_MR GPRX1_Gq (Fig. 1 and Supplementary Fig.5)<br>(2) In the section of “Binding of BAM8-22 to MRGPRX1” (Fig. 2 and Supplementary Fig.7)<br>(3) In the section of “Coupling of MRGPRX1 with Gi and Gq” (Fig. 5 and Supplementary Fig. 10)         |
| CNF-Tx2_MRGPRX1_Gi_model  | CNF-Tx2_MRGPRX1_Gi_map  | 0.95 rmsd            | Receptor: L28-F278<br>G $\alpha$ i: L5-I55, T182-L353<br>G $\beta$ : D5-N340<br>G $\gamma$ : S8-K64<br>scFv: V2-L235<br>ECL1, ECL2 and ICL3 are in general disordered in GPCR                                  | (1) In the section of “Overall structures of MRGPRX1 complexes”, used for structural descriptions for CNF-Tx2_MRGPRX1_Gi (Fig. 1 and Supplementary Fig. 5)<br>(2) In the section of “Binding of CNF-Tx2 to MRGPRX1”, used for structural descriptions for CNF-Tx2_MRGPRX1_Gi complex (Fig. 3)                                                                 |

|  |  |  |                                 |  |
|--|--|--|---------------------------------|--|
|  |  |  | structures and are not modeled. |  |
|--|--|--|---------------------------------|--|



**Supplementary Table 3. The residues with ambiguous side chain densities that only main chain atoms kept in the model of BAM8-22-MRGPRX1-Gi complex, BAM-MRGPRX1-Gq complex and CNF-Tx2-MRGPRX1-Gi complex.**

|               | <b>BAM8-22-MRGPRX1-Gi complex</b>                  | <b>BAM8-22-MRGPRX1-Gq complex</b>                  | <b>CNF-Tx2-MRGPRX1-Gi complex</b>         |
|---------------|----------------------------------------------------|----------------------------------------------------|-------------------------------------------|
| <b>Ligand</b> | <b>E12, D16, K19</b>                               | <b>R10, E12, K19</b>                               | <b>R14, R17</b>                           |
| <b>TM1</b>    | <b>L28, L30, V32, L33, L39, W50, L52, C54, R55</b> | <b>Q26, L28, S29, V32, L33, T34, C35, S38, L49</b> | <b>L30, L33, T31, T34, L39, W50, L51</b>  |
| <b>ICL1</b>   | <b>R57</b>                                         | <b>R55, M56, R57, R58, N59</b>                     | <b>-/-</b>                                |
| <b>TM2</b>    | <b>L80, S86, F87</b>                               | <b>D72, I81</b>                                    | <b>L66, D72, F73, R79, L80, Y82</b>       |
| <b>TM3</b>    | <b>I97</b>                                         | <b>S114</b>                                        | <b>-/-</b>                                |
| <b>TM4</b>    | <b>-/-</b>                                         | <b>S139, H137, M159</b>                            | <b>H137, C161</b>                         |
| <b>TM5</b>    | <b>T172, Q174</b>                                  | <b>Q174, F178, R177, V190, C204</b>                | <b>S176, F178, T180, C204</b>             |
| <b>ICL3</b>   | <b>-/-</b>                                         | <b>S206, R207, K208, I209</b>                      | <b>-/-</b>                                |
| <b>TM6</b>    | <b>T212, Y215, C228, F239, H243</b>                | <b>L211, L219</b>                                  | <b>T212, R213, Y215, L219, L220, L227</b> |
| <b>ECL3</b>   | <b>E247, V248</b>                                  | <b>E247</b>                                        | <b>-/-</b>                                |
| <b>TM7</b>    | <b>C251, H252, F259, S265, S266</b>                | <b>-/-</b>                                         | <b>V256, N264, F274</b>                   |

**Supplementary Table 4. The residues with ambiguous main chain densities that not modelled in the BAM8-22-MRGPRX1-Gi complex, BAM8-22-MRGPRX1-Gq complex and CNF-Tx2-MRGPRX1-Gi complex.**

|                   | <b>BAM8-22-MRGPRX1-Gi complex</b> | <b>BAM8-22-MRGPRX1-Gq complex</b>         | <b>CNF-Tx2-MRGPRX1-Gi complex</b>   |
|-------------------|-----------------------------------|-------------------------------------------|-------------------------------------|
| <b>N-terminal</b> | <b>Y24, K25</b>                   | <b>L22</b>                                | <b>-/-</b>                          |
| <b>TM1</b>        | <b>Q26, T27</b>                   | <b>-/-</b>                                | <b>I36, L52, G53, C54, R55, M56</b> |
| <b>ICL1</b>       | <b>-/-</b>                        | <b>-/-</b>                                | <b>R57, R58</b>                     |
| <b>TM2</b>        | <b>I88</b>                        | <b>-/-</b>                                | <b>-/-</b>                          |
| <b>ECL1</b>       | <b>S89</b>                        | <b>T93</b>                                | <b>-/-</b>                          |
| <b>TM3</b>        | <b>I94, S95, K96</b>              | <b>I94</b>                                | <b>-/-</b>                          |
| <b>TM4</b>        | <b>L160</b>                       | <b>-/-</b>                                | <b>L151</b>                         |
| <b>ECL2</b>       | <b>C162</b>                       | <b>F163, L164, F165, S166, G167, A168</b> | <b>-/-</b>                          |
| <b>TM5</b>        | <b>-/-</b>                        | <b>D169, S170, A171</b>                   | <b>-/-</b>                          |
| <b>ICL3</b>       | <b>K208, I209, L211</b>           | <b>G205, I209</b>                         | <b>G205, S206, R207, K208, I209</b> |
| <b>TM6</b>        | <b>P210</b>                       | <b>P210</b>                               | <b>P210</b>                         |
| <b>ECL3</b>       | <b>D245, R246, E247, V248</b>     | <b>-/-</b>                                | <b>-/-</b>                          |
| <b>TM7</b>        | <b>S277, F278</b>                 | <b>-/-</b>                                | <b>L249, G276, S277, F278</b>       |

**Supplementary Table 5: Interaction of BAM8-22 and MRGPRX1 in BAM8-22-MRGPRX1-Gi complex.**

| <b>Interaction</b>                                                                                 | <b>MRGPRX1</b> | <b>BAM8-22</b> | <b>Distance (Å)</b> |
|----------------------------------------------------------------------------------------------------|----------------|----------------|---------------------|
| <b>Hydrogen bond (<math>\leq 3.5</math> Å)</b>                                                     | <b>E157</b>    | <b>Y21</b>     | <b>2.6</b>          |
|                                                                                                    | <b>W241</b>    | <b>W14</b>     | <b>2.8</b>          |
| <b>Hydrophobic and van der Waals force (<math>\leq 4.5</math> Å)</b>                               | <b>P100</b>    | <b>Y21</b>     | <b>4.5</b>          |
|                                                                                                    | <b>E157</b>    | <b>Y21</b>     | <b>4.1</b>          |
|                                                                                                    |                | <b>R20</b>     | <b>2.9</b>          |
|                                                                                                    | <b>W158</b>    | <b>Y21</b>     | <b>3.5</b>          |
|                                                                                                    | <b>F236</b>    | <b>Y17</b>     | <b>3.9</b>          |
|                                                                                                    |                | <b>R20</b>     | <b>3.8</b>          |
|                                                                                                    | <b>F237</b>    | <b>R20</b>     | <b>3.2</b>          |
|                                                                                                    | <b>L240</b>    | <b>W14</b>     | <b>3.8</b>          |
|                                                                                                    |                | <b>W13</b>     | <b>2.8</b>          |
|                                                                                                    |                | <b>Q18</b>     | <b>4.0</b>          |
|                                                                                                    | <b>W241</b>    | <b>W13</b>     | <b>3.7</b>          |
|                                                                                                    |                | <b>P11</b>     | <b>3.5</b>          |
|                                                                                                    | <b>I242</b>    | <b>W13</b>     | <b>3.8</b>          |
|                                                                                                    | <b>H243</b>    | <b>W13</b>     | <b>4.0</b>          |
|                                                                                                    | <b>R246</b>    | <b>M15</b>     | <b>4.0</b>          |
|                                                                                                    | <b>L249</b>    | <b>M15</b>     | <b>4.2</b>          |
| <b>Y17</b>                                                                                         |                | <b>3.4</b>     |                     |
| <b>Q18</b>                                                                                         |                | <b>3.2</b>     |                     |
| <b>F250</b>                                                                                        | <b>Y17</b>     | <b>4.3</b>     |                     |
| <b>H254</b>                                                                                        | <b>Y17</b>     | <b>3.0</b>     |                     |
| <b>Polar (<math>\leq 4.5</math> Å)</b>                                                             | <b>Y99</b>     | <b>R20</b>     | <b>3.6</b>          |
|                                                                                                    | <b>S154</b>    | <b>Y21</b>     | <b>3.5</b>          |
|                                                                                                    | <b>E157</b>    | <b>R20</b>     | <b>2.7</b>          |
|                                                                                                    | <b>D177</b>    | <b>R20</b>     | <b>3.4</b>          |
| <b><math>\pi</math>-<math>\pi</math> stacking (Edge-<math>\pi</math>, <math>\leq 8.0</math> Å)</b> | <b>Y99</b>     | <b>Y21</b>     | <b>3.7</b>          |
|                                                                                                    | <b>W158</b>    | <b>Y21</b>     | <b>3.5</b>          |
|                                                                                                    | <b>F239</b>    | <b>W13</b>     | <b>7.4</b>          |
|                                                                                                    | <b>F250</b>    | <b>Y17</b>     | <b>3.3</b>          |

**Supplementary Table 6: Interaction of BAM8-22 and MRGPRX1 in BAM8-22-MRGPRX1-Gq complex.**

| <b>Interaction</b>                                                                                 | <b>MRGPRX1</b> | <b>BAM8-22</b> | <b>Distance (Å)</b> |
|----------------------------------------------------------------------------------------------------|----------------|----------------|---------------------|
| <b>Hydrophobic and van der Waals force (<math>\leq 4.5</math> Å)</b>                               | <b>Y99</b>     | <b>Y21</b>     | <b>3.5</b>          |
|                                                                                                    |                | <b>R20</b>     | <b>3.2</b>          |
|                                                                                                    | <b>P100</b>    | <b>Y21</b>     | <b>3.8</b>          |
|                                                                                                    | <b>S154</b>    | <b>Y21</b>     | <b>4.4</b>          |
|                                                                                                    | <b>E157</b>    | <b>Y21</b>     | <b>3.8</b>          |
|                                                                                                    | <b>W158</b>    | <b>Y21</b>     | <b>3.7</b>          |
|                                                                                                    | <b>I242</b>    | <b>W13</b>     | <b>4.0</b>          |
|                                                                                                    | <b>H243</b>    | <b>W13</b>     | <b>3.4</b>          |
|                                                                                                    | <b>R246</b>    | <b>M15</b>     | <b>3.1</b>          |
|                                                                                                    | <b>L249</b>    | <b>Y17</b>     | <b>3.1</b>          |
|                                                                                                    |                | <b>Q18</b>     | <b>3.5</b>          |
|                                                                                                    | <b>F250</b>    | <b>Y17</b>     | <b>3.4</b>          |
|                                                                                                    | <b>H254</b>    | <b>Y17</b>     | <b>3.3</b>          |
| <b>Hydrogen bonds (<math>\leq 3.5</math> Å)</b>                                                    | <b>E157</b>    | <b>R20</b>     | <b>2.7</b>          |
|                                                                                                    | <b>D177</b>    | <b>R20</b>     | <b>2.7</b>          |
|                                                                                                    | <b>L240</b>    | <b>W14</b>     | <b>2.8</b>          |
| <b>Polar (<math>\leq 4.5</math> Å)</b>                                                             | <b>F239</b>    | <b>Q18</b>     | <b>3.9</b>          |
| <b><math>\pi</math>-<math>\pi</math> stacking (Edge-<math>\pi</math>, <math>\leq 8.0</math> Å)</b> | <b>Y82</b>     | <b>Y17</b>     | <b>6.9</b>          |
|                                                                                                    | <b>W158</b>    | <b>Y21</b>     | <b>4.6</b>          |
|                                                                                                    | <b>F236</b>    | <b>Y17</b>     | <b>4.3</b>          |
|                                                                                                    | <b>F237</b>    | <b>Y21</b>     | <b>8.0</b>          |
|                                                                                                    | <b>W241</b>    | <b>R20</b>     | <b>3.3</b>          |
|                                                                                                    |                | <b>W14</b>     | <b>4.0</b>          |

**Supplementary Table 7: Interaction of CNF-Tx2 and MRGPRX1 in CNF-Tx2-MRGPRX1-Gi complex.**

| <b>Interaction</b>                                                                                 | <b>MRGPRX1</b> | <b>CNF-Tx2</b> | <b>Distance<br/>(Å)</b> |
|----------------------------------------------------------------------------------------------------|----------------|----------------|-------------------------|
| <b>Hydrophobic and van der<br/>Waals force (<math>\leq 4.5</math> Å)</b>                           | <b>S95</b>     | <b>I18</b>     | <b>4.2</b>              |
|                                                                                                    | <b>Y99</b>     | <b>I18</b>     | <b>3.3</b>              |
|                                                                                                    | <b>L240</b>    | <b>R17</b>     | <b>3.6</b>              |
| <b><math>\pi</math>-<math>\pi</math> stacking (Edge-<math>\pi</math>, <math>\leq 8.0</math> Å)</b> | <b>Y82</b>     | <b>F15</b>     | <b>7.4</b>              |
|                                                                                                    | <b>Y99</b>     | <b>F15</b>     | <b>7.0</b>              |
|                                                                                                    | <b>F236</b>    | <b>F15</b>     | <b>4.0</b>              |

**Supplementary Table 8: Interaction of CNF-Tx2 and MRGPRX1 in CNF-Tx2-MRGPRX1-Gi-MD complex.**

| <b>Interaction</b>                                                                                 | <b>MRGPRX1</b> | <b>CNF-Tx2</b> | <b>Distance<br/>(Å)</b> |
|----------------------------------------------------------------------------------------------------|----------------|----------------|-------------------------|
| <b>Hydrophobic and van der<br/>Waals force (<math>\leq 4.5</math> Å)</b>                           | <b>S95</b>     | <b>I18</b>     | <b>4.0</b>              |
|                                                                                                    | <b>Y99</b>     | <b>I18</b>     | <b>4.0</b>              |
|                                                                                                    |                | <b>R17</b>     | <b>3.7</b>              |
|                                                                                                    | <b>L160</b>    | <b>R14</b>     | <b>4.4</b>              |
|                                                                                                    |                | <b>R17</b>     | <b>3.6</b>              |
|                                                                                                    | <b>S176</b>    | <b>R17</b>     | <b>4.2</b>              |
|                                                                                                    | <b>F237</b>    | <b>R17</b>     | <b>4.0</b>              |
| <b>L240</b>                                                                                        | <b>R17</b>     | <b>3.9</b>     |                         |
| <b><math>\pi</math>-<math>\pi</math> stacking (Edge-<math>\pi</math>, <math>\leq 8.0</math> Å)</b> | <b>Y82</b>     | <b>F15</b>     | <b>7.0</b>              |
|                                                                                                    | <b>F236</b>    | <b>F15</b>     | <b>4.0</b>              |
| <b>Hydrogen bond (<math>\leq 3.5</math> Å)</b>                                                     | <b>E157</b>    | <b>R17</b>     | <b>2.8</b>              |
|                                                                                                    | <b>D177</b>    | <b>R17</b>     | <b>2.8</b>              |

**Supplementary Table 9: Interactions between MRGPRX1 and Gai in BAM8-22-MRGPRX1-Gi complex.**

| <b>Interactions</b>                                                  | <b>MRGPRX1</b> | <b>Gai</b>  | <b>Distance (Å)</b> |
|----------------------------------------------------------------------|----------------|-------------|---------------------|
| <b>Hydrophobic and van der Waals force (<math>\leq 4.5</math> Å)</b> | <b>F61</b>     | <b>D350</b> | <b>4.1</b>          |
|                                                                      |                | <b>C351</b> | <b>3.4</b>          |
|                                                                      | <b>R120</b>    | <b>C351</b> | <b>3.8</b>          |
|                                                                      | <b>S123</b>    | <b>N347</b> | <b>3.9</b>          |
|                                                                      |                | <b>C351</b> | <b>3.9</b>          |
|                                                                      | <b>V124</b>    | <b>L348</b> | <b>4.4</b>          |
|                                                                      | <b>P127</b>    | <b>I344</b> | <b>3.7</b>          |
|                                                                      |                | <b>N347</b> | <b>4.1</b>          |
|                                                                      | <b>I128</b>    | <b>K192</b> | <b>4.4</b>          |
|                                                                      |                | <b>D193</b> | <b>4.0</b>          |
|                                                                      |                | <b>L194</b> | <b>3.6</b>          |
|                                                                      |                | <b>I343</b> | <b>4.3</b>          |
|                                                                      | <b>R131</b>    | <b>R32</b>  | <b>4.3</b>          |
|                                                                      |                | <b>E33</b>  | <b>3.6</b>          |
|                                                                      |                | <b>V34</b>  | <b>3.1</b>          |
|                                                                      |                | <b>I343</b> | <b>3.1</b>          |
|                                                                      | <b>C132</b>    | <b>R32</b>  | <b>4.0</b>          |
|                                                                      |                | <b>L194</b> | <b>3.9</b>          |
|                                                                      | <b>H133</b>    | <b>L193</b> | <b>3.5</b>          |
|                                                                      | <b>R134</b>    | <b>R32</b>  | <b>3.6</b>          |
|                                                                      | <b>P135</b>    | <b>R32</b>  | <b>4.4</b>          |
|                                                                      | <b>T136</b>    | <b>E28</b>  | <b>3.6</b>          |
|                                                                      | <b>L198</b>    | <b>L360</b> | <b>3.9</b>          |
|                                                                      | <b>I202</b>    | <b>L348</b> | <b>4.3</b>          |
|                                                                      | <b>R213</b>    | <b>L353</b> | <b>3.4</b>          |
|                                                                      | <b>R213</b>    | <b>F354</b> | <b>3.8</b>          |
| <b>L214</b>                                                          | <b>L360</b>    | <b>3.7</b>  |                     |
| <b>T217</b>                                                          | <b>T340</b>    | <b>4.0</b>  |                     |
| <b>T217</b>                                                          | <b>I343</b>    | <b>4.2</b>  |                     |
| <b>I218</b>                                                          | <b>T340</b>    | <b>4.2</b>  |                     |
| <b>Polar (<math>\leq 4.5</math> Å)</b>                               | <b>N59</b>     | <b>D350</b> | <b>4.3</b>          |
|                                                                      | <b>R120</b>    | <b>C351</b> | <b>3.6</b>          |
|                                                                      | <b>S123</b>    | <b>C351</b> | <b>3.9</b>          |
|                                                                      | <b>R131</b>    | <b>R32</b>  | <b>3.8</b>          |

|                                                          |             |             |            |
|----------------------------------------------------------|-------------|-------------|------------|
|                                                          | <b>R131</b> | <b>A31</b>  | <b>4.2</b> |
|                                                          |             | <b>T219</b> | <b>4.0</b> |
|                                                          | <b>H133</b> | <b>R32</b>  | <b>3.9</b> |
| <b>Hydrogen bond (<math>\leq 3.5 \text{ \AA}</math>)</b> | <b>S123</b> | <b>N347</b> | <b>3.1</b> |
|                                                          | <b>R131</b> | <b>E33</b>  | <b>2.7</b> |
|                                                          | <b>C132</b> | <b>D193</b> | <b>3.2</b> |
|                                                          | <b>R134</b> | <b>R32</b>  | <b>2.8</b> |
|                                                          | <b>T136</b> | <b>R32</b>  | <b>2.8</b> |



**Supplementary Table 10: Interactions between MRGPRX1 and Gαq in BAM8-22-MRGPRX1-Gq complex.**

| <b>Interactions</b>                                                  | <b>MRGPRX1</b> | <b>Gαq</b>  | <b>Distance (Å)</b> |            |
|----------------------------------------------------------------------|----------------|-------------|---------------------|------------|
| <b>Hydrophobic and van der Waals force (<math>\leq 4.5</math> Å)</b> | <b>N59</b>     | <b>E357</b> | <b>4.4</b>          |            |
|                                                                      | <b>A60</b>     | <b>E357</b> | <b>4.0</b>          |            |
|                                                                      | <b>F61</b>     |             | <b>E357</b>         | <b>3.6</b> |
|                                                                      |                |             | <b>Y358</b>         | <b>3.3</b> |
|                                                                      |                |             | <b>N359</b>         | <b>3.4</b> |
|                                                                      | <b>V116</b>    | <b>Y358</b> | <b>4.2</b>          |            |
|                                                                      | <b>E119</b>    | <b>Y358</b> | <b>3.2</b>          |            |
|                                                                      | <b>R120</b>    |             | <b>Y358</b>         | <b>3.2</b> |
|                                                                      |                |             | <b>L360</b>         | <b>3.9</b> |
|                                                                      | <b>I128</b>    |             | <b>K347</b>         | <b>3.9</b> |
|                                                                      |                |             | <b>I350</b>         | <b>3.8</b> |
|                                                                      | <b>L198</b>    | <b>L360</b> | <b>3.9</b>          |            |
|                                                                      | <b>I202</b>    | <b>L355</b> | <b>4.5</b>          |            |
|                                                                      | <b>S123</b>    |             | <b>N354</b>         | <b>3.7</b> |
|                                                                      |                |             | <b>Y358</b>         | <b>3.3</b> |
|                                                                      | <b>V124</b>    |             | <b>L351</b>         | <b>4.0</b> |
|                                                                      |                |             | <b>L355</b>         | <b>3.4</b> |
|                                                                      |                |             | <b>L360</b>         | <b>4.4</b> |
|                                                                      | <b>P127</b>    |             | <b>I350</b>         | <b>3.1</b> |
|                                                                      |                |             | <b>L351</b>         | <b>3.7</b> |
|                                                                      | <b>Y130</b>    |             | <b>N354</b>         | <b>3.5</b> |
|                                                                      |                |             | <b>E357</b>         | <b>3.3</b> |
|                                                                      |                |             | <b>Y358</b>         | <b>3.0</b> |
| <b>R131</b>                                                          |                | <b>I350</b> | <b>3.3</b>          |            |
|                                                                      |                | <b>M353</b> | <b>4.0</b>          |            |

|                                                                                                    |             |             |            |
|----------------------------------------------------------------------------------------------------|-------------|-------------|------------|
|                                                                                                    | <b>R131</b> | <b>N354</b> | <b>3.6</b> |
|                                                                                                    | <b>C132</b> | <b>R31</b>  | <b>3.6</b> |
|                                                                                                    |             | <b>R32</b>  | <b>3.9</b> |
|                                                                                                    | <b>H133</b> | <b>R32</b>  | <b>3.5</b> |
|                                                                                                    | <b>T136</b> | <b>K27</b>  | <b>4.5</b> |
|                                                                                                    | <b>P210</b> | <b>V361</b> | <b>4.1</b> |
|                                                                                                    | <b>R213</b> | <b>L360</b> | <b>4.0</b> |
|                                                                                                    |             | <b>N359</b> | <b>4.0</b> |
|                                                                                                    |             | <b>V361</b> | <b>4.1</b> |
|                                                                                                    | <b>L214</b> | <b>L355</b> | <b>4.3</b> |
|                                                                                                    |             | <b>L360</b> | <b>3.4</b> |
|                                                                                                    | <b>T217</b> | <b>N359</b> | <b>4.3</b> |
|                                                                                                    | <b>I218</b> | <b>L360</b> | <b>4.1</b> |
|                                                                                                    | <b>G276</b> | <b>N359</b> | <b>3.9</b> |
| <b>Hydrogen bond (<math>\leq 3.5</math> Å)</b>                                                     | <b>P127</b> | <b>N354</b> | <b>3.3</b> |
|                                                                                                    | <b>Y130</b> | <b>E357</b> | <b>2.4</b> |
|                                                                                                    | <b>Y130</b> | <b>Y358</b> | <b>2.4</b> |
|                                                                                                    | <b>R131</b> | <b>N354</b> | <b>2.6</b> |
|                                                                                                    | <b>C132</b> | <b>R31</b>  | <b>3.3</b> |
|                                                                                                    | <b>R134</b> | <b>R31</b>  | <b>2.9</b> |
|                                                                                                    | <b>L214</b> | <b>L360</b> | <b>3.3</b> |
|                                                                                                    | <b>Y272</b> | <b>N359</b> | <b>3.2</b> |
| <b>Polar (<math>\leq 4.5</math> Å)</b>                                                             | <b>A60</b>  | <b>E357</b> | <b>3.7</b> |
|                                                                                                    | <b>H133</b> | <b>R32</b>  | <b>3.7</b> |
|                                                                                                    | <b>R213</b> | <b>N359</b> | <b>4.0</b> |
|                                                                                                    | <b>T217</b> | <b>N359</b> | <b>3.7</b> |
| <b><math>\pi</math>-<math>\pi</math> stacking (Edge-<math>\pi</math>, <math>\leq 8.0</math> Å)</b> | <b>Y64</b>  | <b>Y358</b> | <b>5.9</b> |
